# Supplementary material
Source: PubMed Central journal article supplement (PMC8592546)
Supplement: jci-131-148225-s179.pdf [file jci-131-148225-s179.pdf]

**Title**

Metabolic imbalance of T cells in COVID-19 is hallmarked by basigin and mitigated by dexamethasone

**Authors**

Peter J. Siska, Sonja-Maria Decking, Nathalie Babl, Carina Matos, Christina Bruss, Katrin Singer, Jana Klitzke, Marian Schön, Jakob Simeth, Josef Köstler, Heiko Siegmund, Ines Ugele, Michael Paulus, Alexander Dietl, Kristina Kolodova, Louisa Steines, Katharina Freitag, Alice Peuker, Gabriele Schönhammer, Johanna Raithel, Bernhard Graf, Florian Geismann, Matthias Lubnow, Matthias Mack, Peter Hau, Christopher Bohr, Ralph Burkhardt, Andre Gessner, Bernd Salzberger, Ralf Wagner, Frank Hanses, Florian Hitzenbichler, Daniel Heudobler, Florian Lüke, Tobias Pukrop, Wolfgang Herr, Daniel Wolff, Rainer Spang, Hendrik Poeck, Petra Hoffmann, Jonathan Jantsch, Christoph Brochhausen, Dirk Lenz, Michael Rehli, Marina Kreutz and Kathrin Renner

**Correspondence**

[Marina.Kreutz@ukr.de](mailto:Marina.Kreutz@ukr.de)

**Running Title**

Immunometabolism in COVID-19

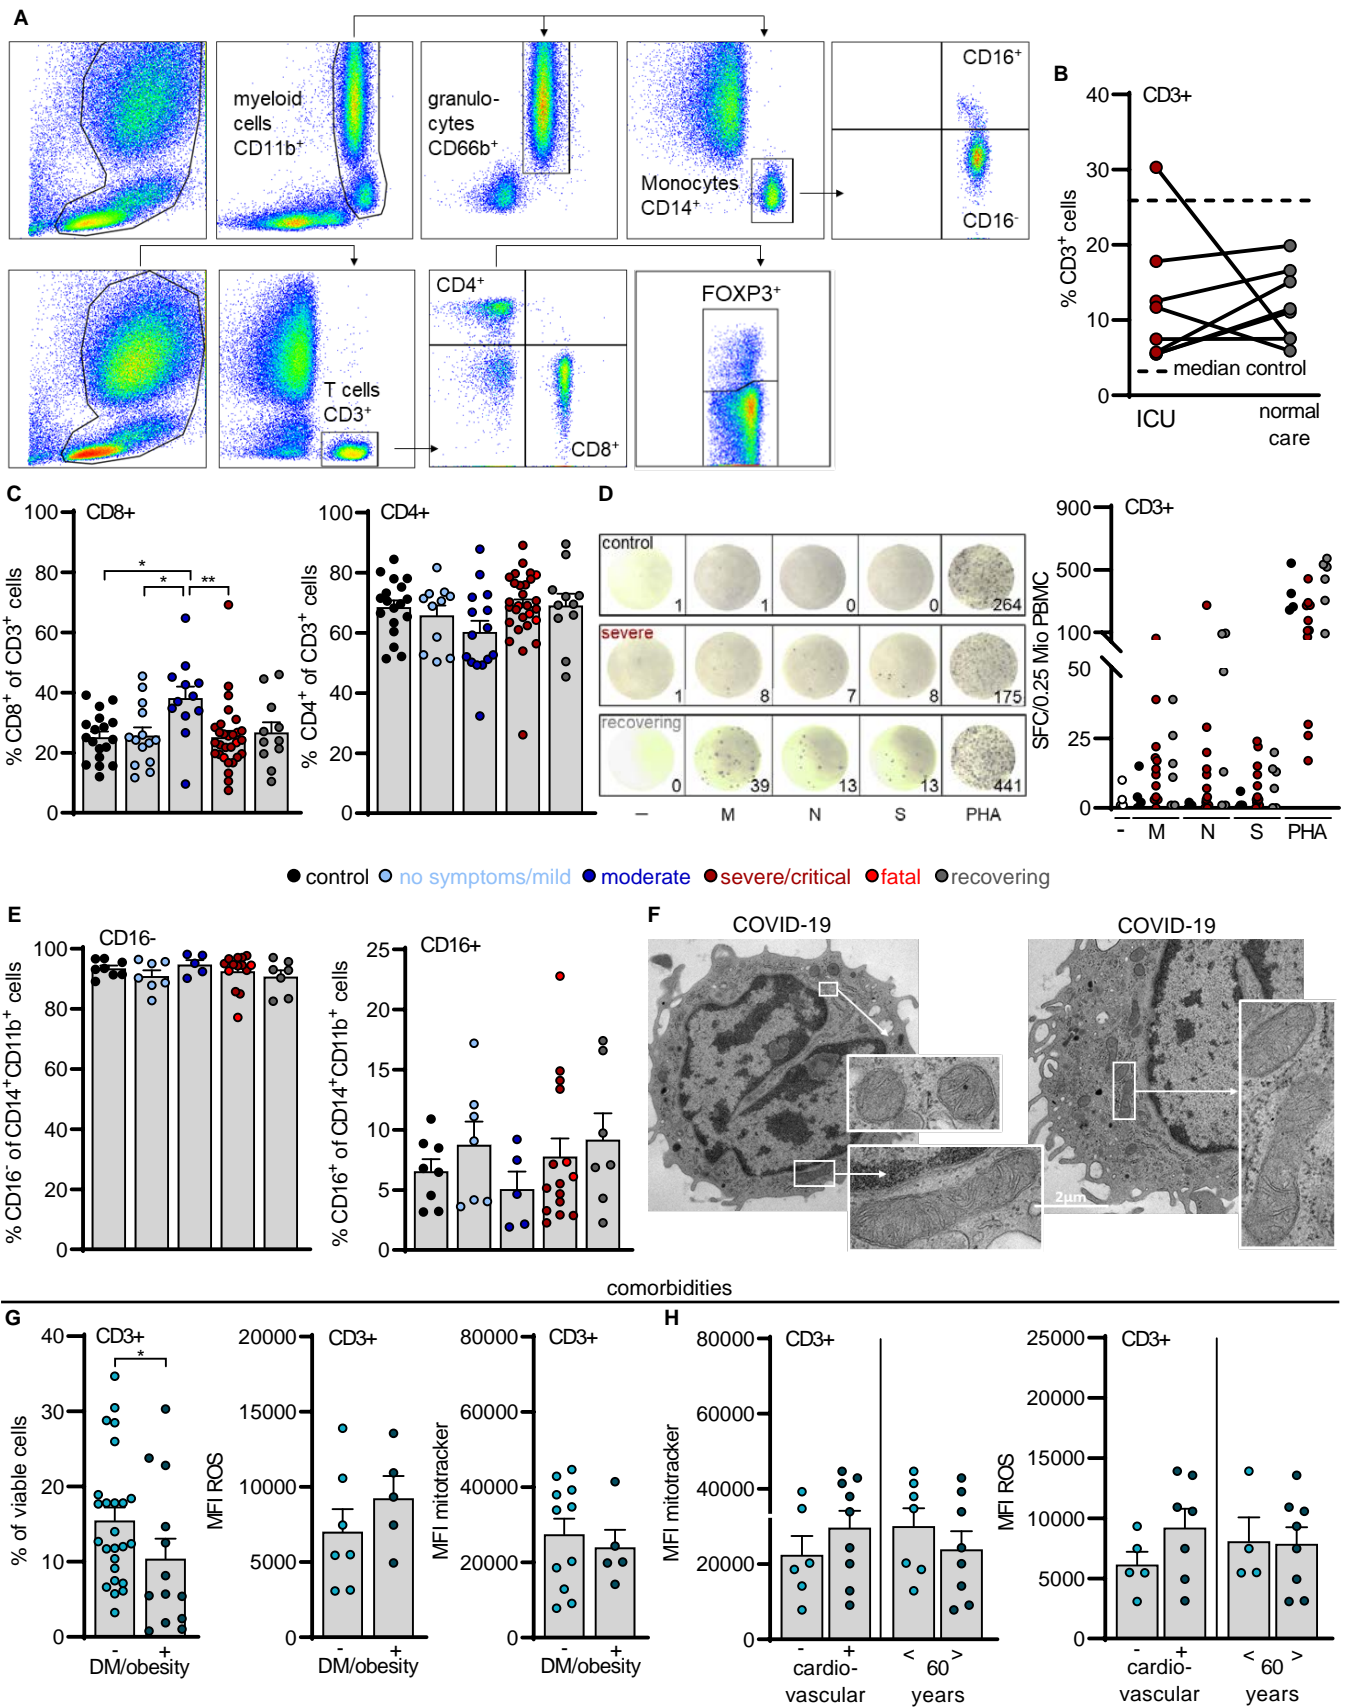

**Figure S1. Immune cell frequencies, mitochondrial morphology and ROS accumulation in relation to comorbidities in COVID 19 patients.**

Blood of donors was drawn and processed on the same day. Fresh samples were not subject to any manipulation, such as mononuclear cell enrichment or cryopreservation, only erythrocytes were removed by ACK lysis. Multi-parameter flow cytometry was performed to discriminate cells based on expression of CD14/CD11b (monocytes) and CD16+/- (monocyte subsets), CD66b/CD11b (granulocytes), CD3 (T cells), T cell subsets expressing CD4 or CD8 and FOXP3. **(A)** Representative plots displaying the gating strategy for specific immune cell populations. **(B)** CD3+ T cells among viable cells were determined in paired samples of patients taken at the intensive care unit (ICU) and after returning to normal care unit (normal care). **(C)** CD8+ and CD4+ T cell subpopulations among CD3+ cell are displayed. **(D)** The occurrence of antigen specific T cells was analyzed in severe/critically ill patients, patients recovering from a severe disease and controls by stimulating PBMCs with three different SARS-CoV-2 peptides (M, N, S) and antigen specific T cell released interferon- $\gamma$  (IFN $\gamma$ ) was determined by ELISPOT assay. Phytohemagglutinin (PHA) was used as a positive control, medium (-) addition as negative control. **(E)** Portion of CD14+CD16- or CD14+CD16+ monocytes among the CD11b+ population is displayed. **(F)** Analysis of mitochondrial structure by electron microscopy in monocytes from critically ill COVID-19 patients. Shown are representative examples. Number of CD3+ T cells, cytosolic ROS accumulation and mitochondrial content in relation to diabetes/obesity **(G)** or cardiovascular diseases and age **(H)**. **(B - E, G, H)** Each symbol represents one donor and in **(C, E, G, H)** summarized data are displayed as mean + SEM. Significances were calculated by **(C)** one-way ANOVA, Bonferroni multiple comparisons test or by **(G)** Mann Whitney U test (\* $p < 0.05$ , \*\* $p < 0.01$ ).

basigin interaction network

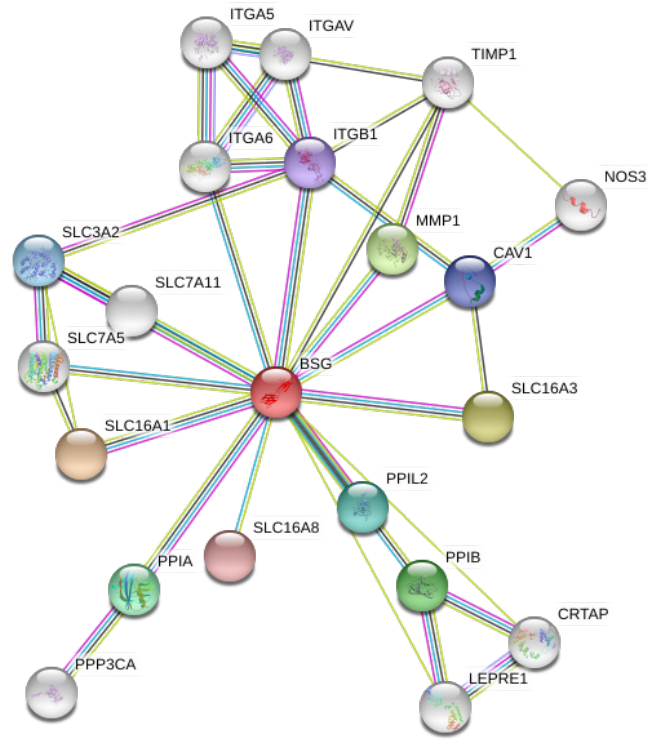

**Figure S2. Interaction partners of basigin.**

Basigin interaction partners were defined by STRING (1).

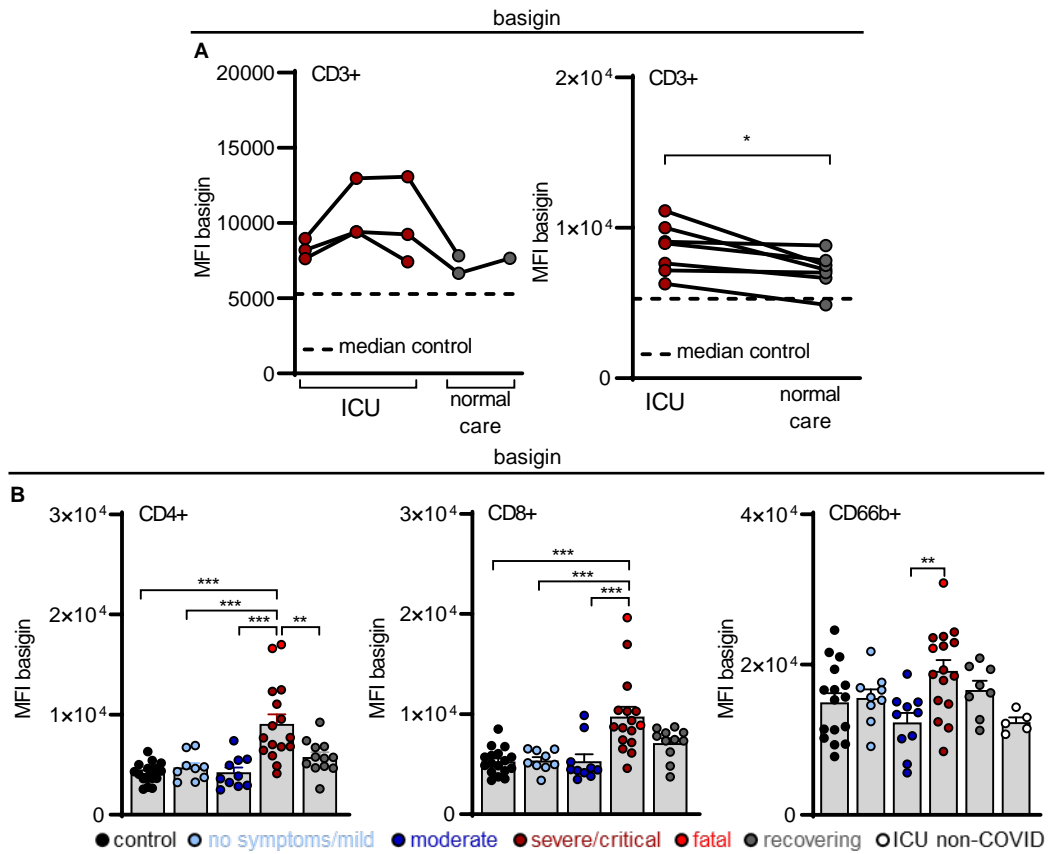

**Figure S3. T cell basigin expression over time, in T cell populations and granulocytes.**

**(A)** Basigin expression on CD3+ cells analyzed in a time dependent manner in paired samples of three patients taken at the intensive care unit (ICU) and after returning to normal care unit (normal care) and basigin expression in paired samples of 6 patients taken at the intensive care unit (ICU) and after returning to normal care unit (normal care, Wilcoxon matched-pairs signed rank test, \* $p < 0.05$ ).

**(B)** Basigin expression was determined on CD4+ T cell populations and CD66b+ granulocytes. A single symbol for each donor is displayed and summarized data are shown as mean + SEM (one-way ANOVA, Bonferroni multiple comparisons test, \*\* $p < 0.01$ , \*\*\* $p < 0.001$ ).

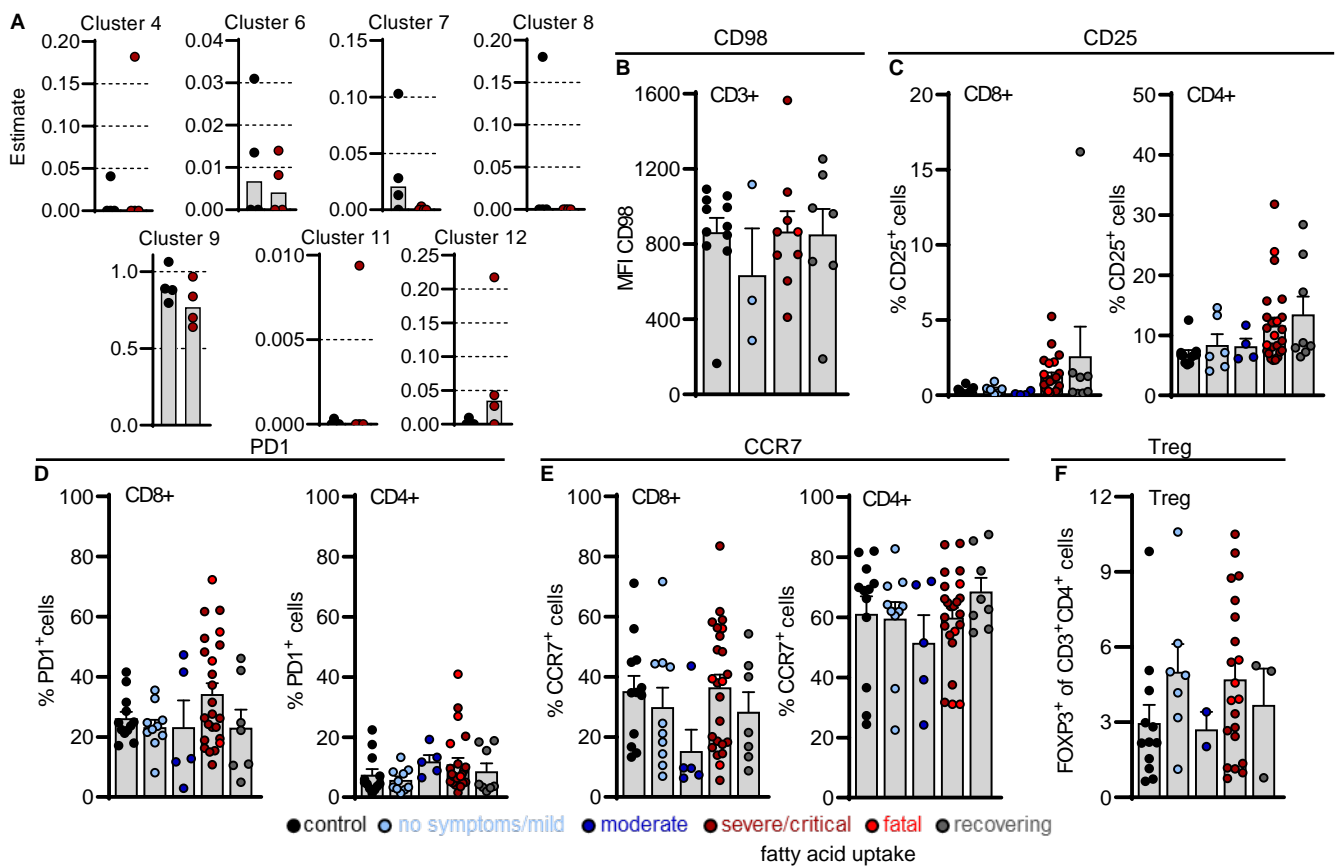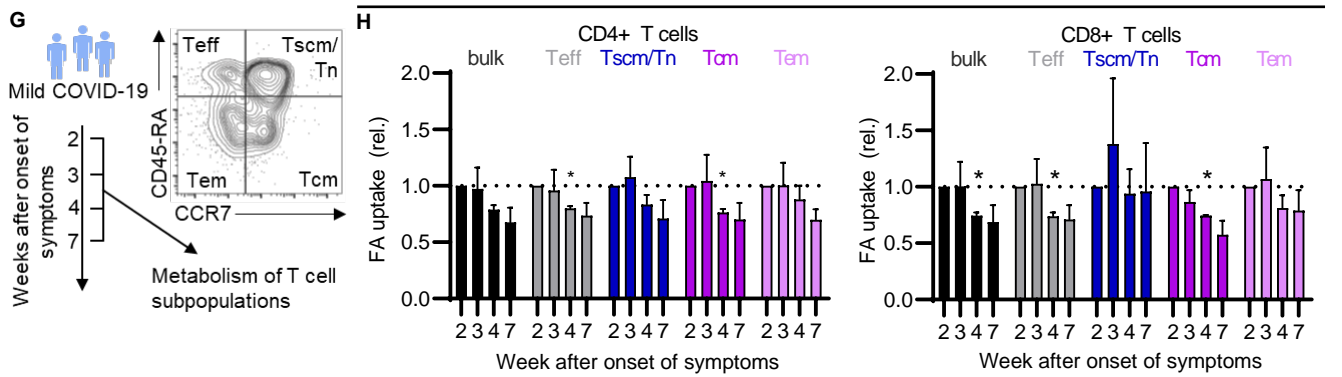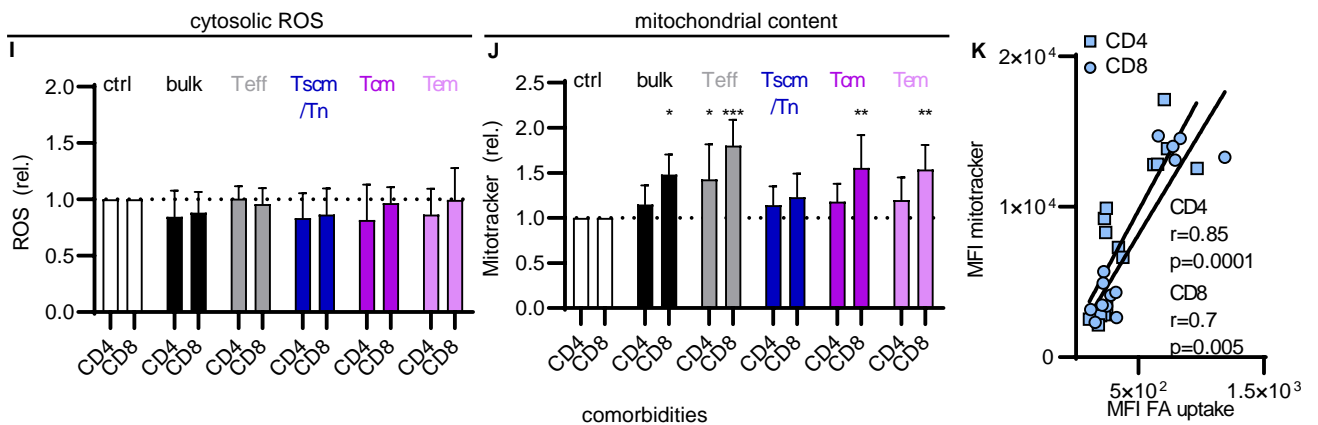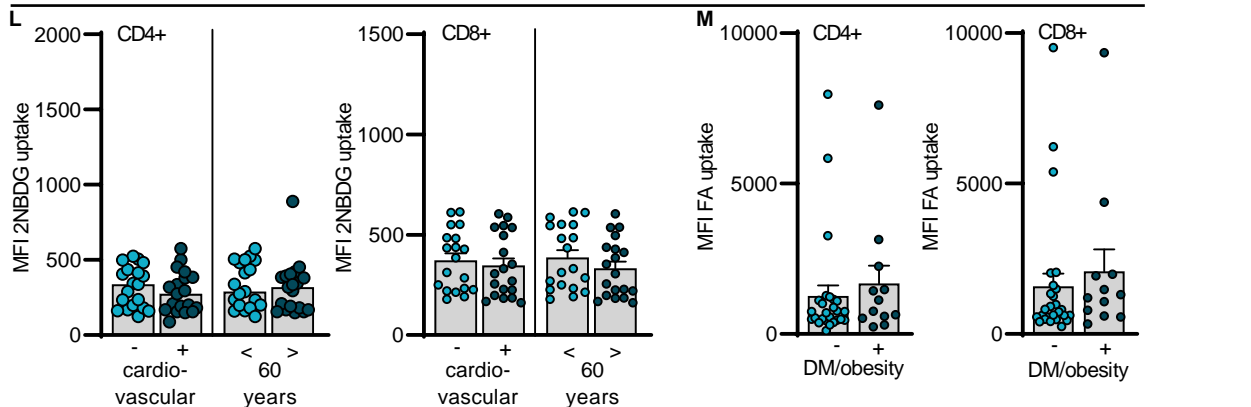

**Figure S4. Activation marker expression and metabolic activity of T cells in COVID-19 patients with and without selected comorbidities.**

(A) Digital tissue deconvolution (DTD) was applied to process publicly available COVID-19 peripheral blood mononuclear cell single-cell transcriptomic data (2). Leiden clustering was used to identify 14 unique clusters, 8 of which could be found using DTD in CD4+ T cell bulk sequencing data (**Figure 2A,C,E**). UMAP embedding is shown in Figure 3A and was computed on all CD4+ cells that the analysis is based on and the clusters that were found using the Leiden resolution algorithm. Detectable clusters estimates in CD4+ T cells from controls and COVID-19 patients from the severe/critical group are shown (Mann-Whitney U test, n.s.). (**B-F**) Peripheral blood was drawn and processed on the same day. Erythrocytes were removed by ACK lysis and immune cell populations were stained for indicated surface markers. Summarized data are displayed as mean + SEM and a single symbol for each donor. (**B**) CD98 expression on CD3+ T cells was analyzed. CD25 (**C**), PD-1 (**D**) and CCR7 (**E**) expression on CD4+ and CD8+ T cell subpopulations was analyzed and portion of FOXP3+ cells among CD3+CD4+ cells (**F**). (**G-K**) Peripheral blood mononuclear cells were isolated by Ficoll separation at indicated time points and cryopreserved until analysis. (**G**) Sampling scheme of blood from 3 patients of one family with mild COVID-19. (**H**) Fatty uptake in CD4+ and CD8+ T cell subsets. Shown is the mean + SEM of values normalized to the first blood sample drawn (Mixed-effects model with the Geisser-Greenhouse correction, with Bonferroni's multiple comparisons test, \* $p < 0.05$ ). Cytosolic ROS (**I**) and mitochondrial content (**J**) as in (**H**), normalized to healthy control samples at time point 2 weeks after the onset of symptoms. (**K**) Data from (**H,J**) in correlation. Shown are pooled values for CD4+ and CD8+ T cells from 3 patients and 4 time points. (**L,M**) Peripheral blood was drawn and processed on the same day. Erythrocytes were removed by ACK lysis and immune cell populations were stained for population specific surface markers. Comparison of 2NBDG and FA uptake in CD4+ and CD8+ T cells from COVID-19 patients in relation to age and with or without depicted pre-existing comorbidities (diabetes mellitus, DM). Shown is the mean + SEM, each symbol represents one donor (Mann-Whitney U test, \* $p < 0.05$ ).

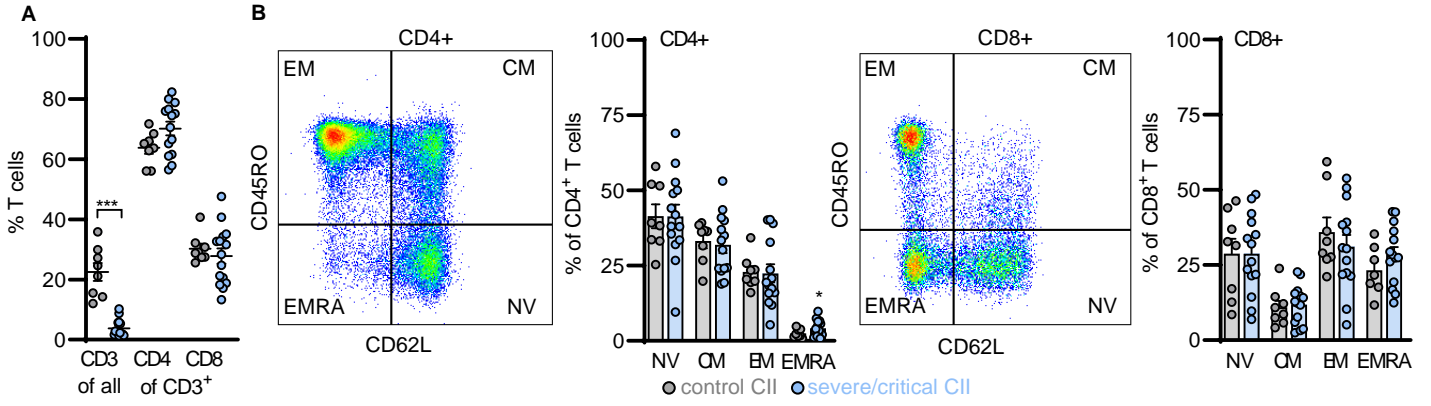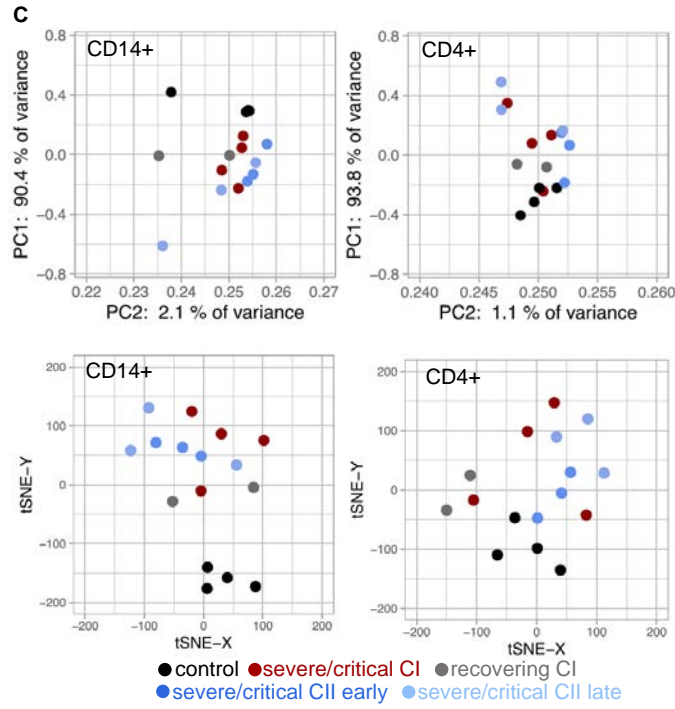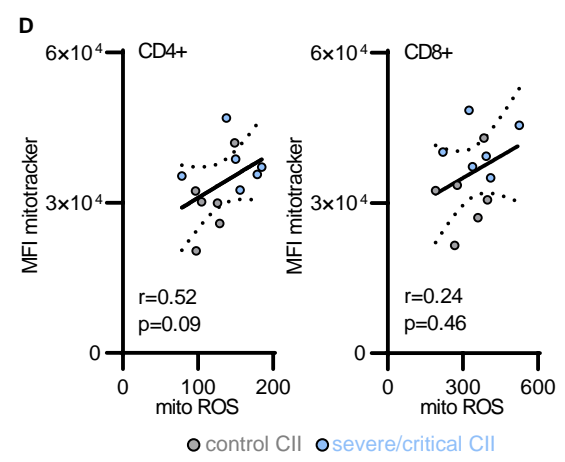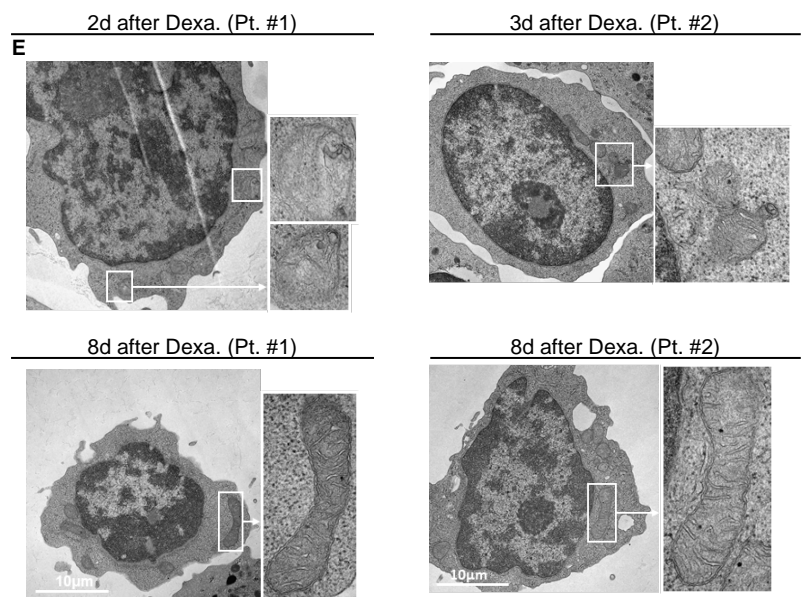

|        | d/after Dexa. | damage* |
|--------|---------------|---------|
| Pt. #1 | 2             | 50%     |
| Pt. #1 | 8             | 11%     |
| Pt. #2 | 3             | 33%     |
| Pt. #2 | 8             | 10%     |

\* % lymphocytes with mitochondrial inclusions

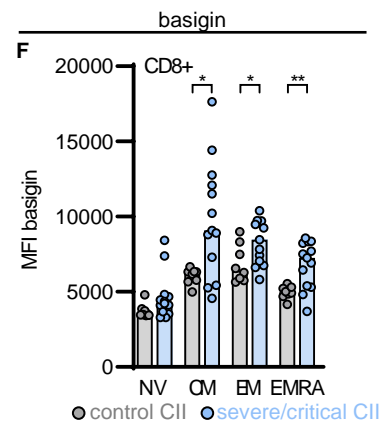



**Figure S5. Dexamethasone treated severe/critical patients show increased mitochondrial ROS levels and disturbed mitochondrial morphology.**

A second cohort of critically ill COVID-19 patients receiving dexamethasone as standard of care was analyzed. **(A, B, D, F)** Blood of donors was drawn and processed the same day. Erythrocytes were removed by ACK lysis and immune cell populations were stained for population and subpopulation-specific surface markers. **(A)** Portion of CD3+ T cells among all leukocytes and CD4+ and CD8+ T cells among CD3+ lymphocytes in COVID-19 patients and healthy controls. **(B)** Subset distribution in CD4+ and CD8+ T cells. Subset distribution is determined according to the surface expression of CD45RO and CD62L. Naïve T cells (NV) are CD45RO-CD62L+, central memory T cells (CM) are CD45RO+CD62L+, effector memory T cells (EM) CD45RO+CD62L-, effector memory cells re-expressing CD45RA are CD45RO-CD62L-. Shown is the gating strategy for CD4+ and CD8+ T cell subsets and summarized data are displayed as mean + SEM and a single symbol for each donor. **(C)** Clustering was performed by PCA and t-SNE analysis of CD4+ T cells and CD14+ monocytes of healthy controls and COVID-19 patients of both cohorts and recovering patients. **(D)** Correlation of mitochondrial ROS, determined by MitoSOX, and mitochondrial content, determined by mitotracker staining, in corresponding sample. Correlation was calculated by Spearman  $r$ . **(E)** Analysis of mitochondrial structure by electron microscopy in lymphocytes from two representative critically ill COVID-19 patients at indicated days after end of dexamethasone treatment. Shown are representative examples. **(F)** Basigin expression in CD8+ T cell subsets in controls and critically ill COVID-19 patients. Summarized data are displayed as mean + SEM and a single symbol for each donor (one-way ANOVA, Bonferroni multiple comparisons test, \* $p < 0.05$ , \*\* $p < 0.01$ ).

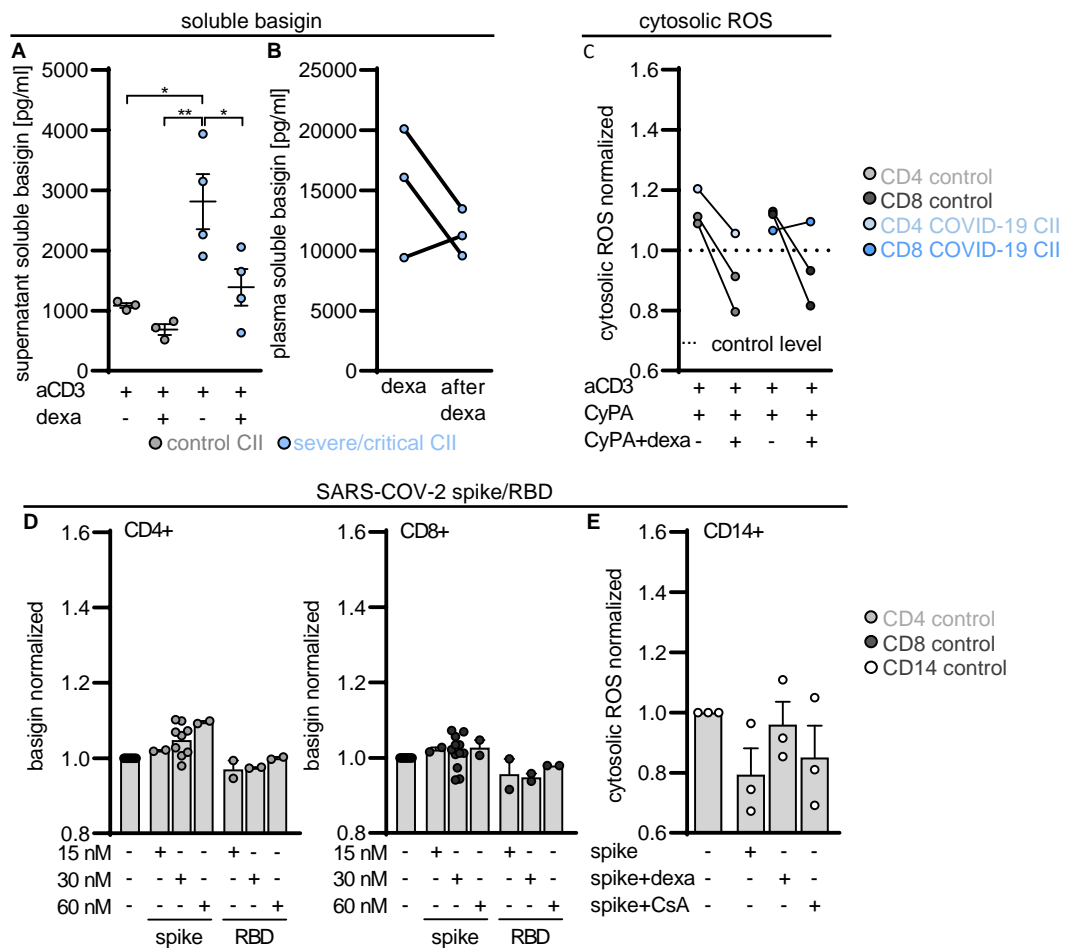

**Figure S6. Impact of cyclophilin A, spike and RBD on basigin and ROS and interference with dexamethasone and cyclosporine A.**

(A, C, D, E) Blood of donors was drawn and processed the same day. Mononuclear cells (MNCs) were isolated by Ficoll separation and  $0.3 \times 10^6$  MNCs were incubated and treated as indicated. (A) Soluble basigin was measured in culture supernatants of 3 days anti-CD3 (aCD3) stimulated MNCs in the presence or absence of 500 nM dexamethasone (dexa). (B) Soluble basigin was measured in the plasma of paired patient samples under dexamethasone treatment and beyond treatment cessation. (C) Cytosolic ROS was determined in 24 h anti-CD3 (aCD3) stimulated MNCs stained for CD4+ and CD8+ in the presence or absence of CyPA and dexamethasone. Data normalized to anti-CD3 (aCD3) stimulated T cells of the respective donor are shown. (D) Basigin expression on CD4+ and CD8+ T cells in the absence or presence of increasing concentrations of the SARS-CoV-2 spike protein or Receptor Binding Domain (RBD). Data normalized to unstimulated T cells of the respective donor are shown. (E) Cytosolic ROS in CD14+ monocytes treated as indicated. Data normalized to unstimulated cells of the respective donor are shown. (A-E) A single symbol for each donor is displayed, summarized data are displayed as (A) mean  $\pm$  SEM, (D, E) mean + SEM.

**Table S1. Clinical characteristics of COVID-19 patients (cohort I).**

|                                                       | <b>None/mild (n=15)</b> | <b>Moderate (n=5)</b> | <b>Severe/critical (n=27)</b> | <b>p-value<sup>b</sup></b> |
|-------------------------------------------------------|-------------------------|-----------------------|-------------------------------|----------------------------|
| <b>Clinical characteristics</b>                       |                         |                       |                               |                            |
| <b>Age (y)</b>                                        | 57.9 (43.9-67.2)        | 60.2 (49.8-74.8)      | 58.2 (46.7-68.1)              | 0.726                      |
| <b>Male gender</b>                                    | 7/15 (47%)              | 3/5 (60%)             | 17/27 (63%)                   | 0.588                      |
| <b>Prior malignancy</b>                               | 5/13 (38%)              | 1/5 (20%)             | 5/27 (19%)                    | 0.377                      |
| <b>Prior transplantation and/or immunosuppression</b> | 1/13 (8%)               | 2/5 (40%)             | 2/27 (7%)                     | 0.093                      |
| <b>Prior type 2 diabetes and/or adipositas</b>        | 5/14 (36%)              | 1/5 (20%)             | 10/27 (37%)                   | 0.761                      |
| <b>Prior hypertension</b>                             | 5/14 (36%)              | 2/4 (50%)             | 11/24 (46%)                   | 0.749                      |
| <b>Prior arrhythmia</b>                               | 2/14 (14%)              | 1/4 (25%)             | 7/27 (26%)                    | 0.690                      |
| <b>Prior cardiovascular comorbidity</b>               | 7/14 (50%)              | 4/5 (80%)             | 13/27 (48%)                   | 0.416                      |
| <b>Mechanical ventilation</b>                         | 0/14 (0%)               | 0/4 (0%)              | 24/27 (89%)                   | <0.001                     |
| <b>Extracorporeal membrane oxygenation</b>            | 0/14 (0%)               | 0/4 (0%)              | 11/27 (41%)                   | <0.01                      |
| <b>Antibody response</b>                              | 3/6 (50%)               | 2/3 (67%)             | 22/22 (100%)                  | <0.01                      |
| <b>Death</b>                                          | 0/14 (0%)               | 0/5 (0%)              | 4/27 (15%)                    | 0.214                      |
|                                                       |                         |                       |                               |                            |
| <b>Laboratory values<sup>a</sup></b>                  |                         |                       |                               |                            |
| <b>Ferritin (ng/ml)</b>                               | 402.5 (247-3279)        | na                    | 1461 (863-3705)               | 0.4072                     |
| <b>Leukocytes (/nl)</b>                               | 6.1 (3.8-9.4)           | 4.89 (4.2-6.6)        | 8.05 (5.1-16.5)               | 0.1642                     |
| <b>Lactate dehydrogenase (U/l)</b>                    | 204.5 (152.5-215.3)     | 379 (251-387)         | 284 (247-381.5)               | 0.1147                     |
| <b>C-reactive protein (mg/l)</b>                      | 13.7 (5.5-30.3)         | 100 (33.9-130)        | 59.8 (19.8-97.8)              | 0.0487                     |
| <b>Neutrophils (%)</b>                                | 62.7 (51.6-68.1)        | 65.9 (34.2-85.4)      | 70.55 (59.6-81.6)             | 0.5520                     |
| <b>Basophils (%)</b>                                  | 0.4 (0.2-0.4)           | 0.2 (0.2-1.4)         | 0.55 (0.2-0.9)                | 0.5999                     |
| <b>Eosinophils (%)</b>                                | 2.5 (1.5-3.4)           | 1.8 (0.5-2)           | 3 (0.6-5.0)                   | 0.6176                     |
| <b>Monocytes (%)</b>                                  | 8.3 (8-9.3)             | 8.8 (7.6-18.3)        | 8.1 (5.8-10.5)                | 0.2499                     |
| <b>Lymphocytes (%)</b>                                | 26.8 (20.2-3)           | 21.9 (6.3-45.5)       | 17.3 (11.3-24.1)              | 0.6218                     |
| <b>Immature granulocytes (%)</b>                      | 0.3 (0.2-0.5)           | 2.2 (0.8-3.4)         | 1.2 (0.5-3.4)                 | 0.2006                     |

<sup>a</sup> Laboratory values from the day of subsequent single-cell analyses

<sup>b</sup> Statistical tests used: Kruskal-Wallis (age), chi-squared test after Pearson (all categorical variables), students t-test (ferritin), one-way ANOVA (leukocytes and all other laboratory values). For continuous variables, data are medians and interquartile range. For categorical variables, data counts and percentages of patients if data were available.

**Table S2. Clinical characteristics of COVID-19 patients (cohort II).**

|                                                                         | <b>Mild/moderate (n=14)</b> | <b>Severe/critical (n=26)</b> |
|-------------------------------------------------------------------------|-----------------------------|-------------------------------|
| <b>Clinical characteristics</b>                                         |                             |                               |
| <b>Age (y)</b>                                                          | 60 (50-77)                  | 55 (48-65)                    |
| <b>Male gender</b>                                                      | 10/14 (71%)                 | 20/26 (77%)                   |
| <b>Prior transplantation and/or immunosuppression and/or malignancy</b> | 5/7 (71%)                   | 3/23 (13%)                    |
| <b>Prior type 2 diabetes and/or adipositas</b>                          | 4/9 (44%)                   | 11/23 (48%)                   |
| <b>Prior cardiovascular comorbidity</b>                                 | 8/10 (80%)                  | 8/23 (35%)                    |
| <b>Mechanical ventilation</b>                                           | 0/14 (0%)                   | 20/22 (91%)                   |
| <b>Antibody response</b>                                                | n.t.                        | 20/20 (100%)                  |
| <b>Death</b>                                                            | 0/14 (0%)                   | 2/19 (11%)                    |
| <b>Laboratory values</b>                                                |                             |                               |
| <b>Ferritin (ng/ml)</b>                                                 | 668.5 (299.75-884)          | 1034 (426-1619)               |
| <b>Leukocytes ( /nl)</b>                                                | 4.94 (4.62-7.36)            | 9.34 (7.18-15.38)             |
| <b>Lactate dehydrogenase (U/l)</b>                                      | 258 (226-284)               | 395 (269-511.5)               |
| <b>C-reactive protein (mg/l)</b>                                        | 53.5 (7.4-81.8)             | 50.6 (16.5-129.5)             |
| <b>Neutrophils (%)</b>                                                  | 72.2 (67.73-73.08)          | 75.45 (69.25-82.65)           |
| <b>Basophils (%)</b>                                                    | 0.2 (0.2-0.65)              | 0.4 (0.2-0.6)                 |
| <b>Eosinophils (%)</b>                                                  | 0.9 (0.03-2.3)              | 0.05 (0-1.225)                |
| <b>Monocytes (%)</b>                                                    | 9.8 (8.1-12.55)             | 8 (5.8-10.7)                  |
| <b>Lymphocytes (%)</b>                                                  | 16.25 (13.73-22.3)          | 9.45 (6.4-15.05)              |
| <b>Immature granulocytes (%)</b>                                        | 0.3 (0.2-0.7)               | 2.8 (0.8-7.225)               |

**Table S3. Clinical characteristics of critically ill non-COVID patients.**

**Clinical characteristics**

|                                                       |                                                                      |
|-------------------------------------------------------|----------------------------------------------------------------------|
| <b>Diagnosis</b>                                      | Severe stroke or brain injury requiring mechanical ventilation (n=6) |
| <b>Age (y)</b>                                        | 68 (51-75.8)                                                         |
| <b>Male gender</b>                                    | 3/6 (50%)                                                            |
| <b>Prior malignancy</b>                               | 1/6 (16.67%)                                                         |
| <b>Prior transplantation and/or immunosuppression</b> | 1/6 (16.67%)                                                         |
| <b>Prior type 2 diabetes</b>                          | 2/6 (33.33%)                                                         |
| <b>Prior type 2 adipositas</b>                        | 0/6 (0.00%)                                                          |
| <b>Prior cardiovascular comorbidity</b>               | 2/6 (33.33%)                                                         |
| <b>Mechanical ventilation</b>                         | 6/6 (100.00%)                                                        |
| <b>Death</b>                                          | 1/6 (16.67%)                                                         |
| <b>Laboratory values</b>                              |                                                                      |
| <b>Leukocytes (/nl)</b>                               | 8.7 (6.25-17.525)                                                    |
| <b>C-reactive protein (mg/l)</b>                      | 35.8 (9.25-74.725)                                                   |
| <b>Neutrophils (%)</b>                                | 67 (60.5-75)                                                         |
| <b>Basophils (%)</b>                                  | 1 (0-1)                                                              |
| <b>Eosinophils (%)</b>                                | 2 (0.5-6)                                                            |
| <b>Monocytes (%)</b>                                  | 9 (7-12.5)                                                           |
| <b>Lymphocytes (%)</b>                                | 20 (11.5-27.5)                                                       |

## **Methods**

### **Study participants**

This study involved 140 subjects consisting of 87 patients with confirmed SARS-CoV-2 infection, detected in a nasopharyngeal swab or a respiratory sample using routinely established RT-PCR and 47 uninfected controls. The study was approved by the appropriate Institutional Review Board (University Hospital Regensburg, No. 20-1785-101) and conformed to the principles outlined in the Declaration of Helsinki. Included were all patients with positive SARS-CoV-2 testing, excluded was one patient with first-diagnosis of leukemia.

Cohort I COVID-19 patients are described in Table S1 and did not receive dexamethasone treatment. Cohort I controls were asymptomatic healthy individuals with age median of 50 years (IQR 37.25-54.5) and male sex in 42%.

Cohort II COVID-19 patients are described in Table S2 and severely ill patients were all treated with dexamethasone. Cohort II controls were asymptomatic healthy individuals with age median of 51 years (IQR 39-55) and male sex in 54%.

Critically ill non-COVID patients were treated at an intensive care unit for severe stroke or brain injury requiring mechanical ventilation (**Table S3**) and did not receive dexamethasone.

COVID-19 severity was assessed as described previously (3, 4). Briefly, none/mild cases presented with no or mild symptoms and no pulmonary infiltrate; moderate cases presented with respiratory symptoms such as cough and/or shortness of breath and a pulmonary infiltrate; severe/critical cases included patients with persistent tachypnea >30/min, blood oxygen saturation <93%, rapid progress of pulmonary infiltrates within 24 hours, respiratory failure or requirement for mechanical ventilation. Clinical, laboratory, treatment and outcome data were extracted from electronic medical records using standard procedures and confidentiality measures. Routine testing included a differential blood count and biochemical tests. Antibody response was defined by presence of SARS-CoV-2 specific IgG antibodies in serum. Patients were tested for SARS-CoV-2 infection by virus-specific reverse-transcription quantitative real-time PCR (RT-PCR) of respiratory specimens as published (5).

### **Sample collection and processing**

All whole-blood samples analyzed for immune cell frequencies and single cell metabolic assays were analyzed freshly without cryopreservation. Blood was collected using Lithium-Heparin-Tubes (Sarstedt, Nümbrecht, Germany). For ACK lysis, samples were divided in 1 ml portions and incubated for 5 min in 20 ml ACK buffer 1X (6X: 0.155M NH<sub>4</sub>Cl, 0.01M KHCO<sub>3</sub> and 0.1 mM EDTA), afterwards 30 ml of PBS were added, centrifuged (5 min, 523G) and supernatant was discarded. Lysis was repeated using 10 ml ACK and 20 ml PBS per sample. If erythrocytes were still visible in the pellet, a third lysis step (5 ml ACK and 20 ml PBS) was performed and finally cells were washed in 20 ml PBS and resuspended in DPBS with 2% FCS (FACS washing buffer). Finally, cells were counted using the CASY Cell Counter system (cursor settings: CL 6.50 μM, NL 4.50 μM, CR 30 μM, NR 30 μM).

### **Determination of immune cell populations**

For analysis of surface marker expression, 0.2-1\*10<sup>6</sup> cells/tube were stained with respective surface markers (see list of antibodies below). Immune cell populations were stained according to specific surface markers (T cells: anti-CD3, anti-CD4, anti-CD8; myeloid cells: anti-CD11b, monocytes: anti-CD14, granulocytes: anti-CD66b). The gating strategy is displayed in **Figure S1A**. CD4<sup>+</sup> and CD8<sup>+</sup> T cell subpopulations were discriminated by staining for CD45RO and CD62L expression as following: naïve (NV): CD45RO<sup>-</sup> CD62L<sup>+</sup>, central memory (CM): CD45RO<sup>+</sup> CD62L<sup>+</sup>; effector memory (EM): CD45RO<sup>+</sup> CD62L<sup>-</sup> terminally differentiated effector memory cells (EMRA): CD45RO<sup>-</sup> CD62L<sup>-</sup>. The gating strategy is displayed in **Figure S5B**. For determination of regulatory T cells intracellular FOXP3 expression was measured using the Intracellular Fixation and Permeabilization Buffer Set according to manufacturer's

instructions. In brief, after surface marker staining (anti-CD3, anti-CD4), cell membrane was permeabilized and intracellular unspecific binding sites were blocked by incubation with 2% rat serum for 15 minutes and subsequently, intracellular (anti-FOXP3) staining was performed (**Figure S1A**).

### **ELISpot assay for T cell detection**

Human venous blood was collected in lithium-heparin tubes and processed regarding the instructions of the commercial T-SPOT.TB test. The ELISpot plates and chemistry except the specific SARS-CoV-2 antigens were derived from the T-SPOT.TB test. Medium was used as negative control and phytohemagglutinin (PHA) as positive control according to the manufacturer's protocol. Peptides from SARS-CoV-2 were used for antigen stimulation. Shortly, peptides of membrane glycoprotein (Pep. M), nucleocapsid phosphoprotein (Pep. N) and surface glycoprotein (Pep. S) are mainly 15-mer sequences with 11 amino acid overlap of SARS-CoV-2. In brief, 250,000 PBMCs were stimulated with the mentioned antigens and antigen specific T cell released interferon- $\gamma$  (IFN $\gamma$ ) was determined after contact with antigen presenting cells. The released IFN $\gamma$  binds to the pre-coated anti-IFN $\gamma$  antibody on the plate, and after incubation with a second anti-IFN $\gamma$  antibody with a color reaction, the spots were visible on the plate. The test was in house validated with five negative SARS-CoV-2 persons and five SARS-CoV-2 positive patients.

### **Single cell metabolic assays**

Basigin expression was determined by anti-CD147 surface staining simultaneously with the staining for immune cell populations. Cytosolic reactive oxygen species (ROS) were determined after surface marker staining by applying 10  $\mu$ M 2',7'-dichlorofluorescein diacetate for 20 minutes in a cell culture incubator at 37°C in FACS washing buffer in closed tubes. Cells were washed once with 3 ml cold PBS, resuspended in FACS washing buffer and measured immediately. For determination of mitochondrial ROS cells were washed with HBSS, stained with 1  $\mu$ l/ml MitoSOX-TM Red in HBSS and incubated for 20 minutes at 37°C in a cell culture incubator. Subsequently cells were washed and resuspended in FACS washing buffer and immediately measured. Mitochondrial content was assessed by staining with Mitotracker Green FM. Cells were incubated with 15 nM Mitotracker and cyclosporine A (1,3  $\mu$ M) in RPMI 1640 supplemented with 2 mM L-Glutamine for 1 hour at 37°C in a cell culture incubator. Afterwards, surface staining was performed. Glucose and fatty acid uptake was measured using the fluorescent glucose analog 2-[N-(7-nitrobenz-2-oxa-1,3-diazol-4-yl)amino]-2-deoxy-D-glucose (2NBDG) and BODIPY 500/510 C1, C12 dye. Cells were stained with surface antibodies as described above and incubated in with 2NBDG (45 min) or BODIPY 500/510 C1, C12 (20 min). Fluorescence of selected immune cell subpopulations was measured by flow cytometry.

### **Mitochondrial respiratory activity (High-Resolution Respirometry)**

For analysis of mitochondrial function T cells were isolated from mononuclear cells by untouched magnetic bead cell separation using the Pan T cell isolation kit according to the manufacturer's protocol. The amount of antibodies and beads used per cell was doubled to account for the increased portion of granulocytes and monocytes in COVID-19 patients and an additional washing step (2 ml) of the column was performed. Purity of cells was checked using the CASY cell counter system, allowing discrimination of T cells and monocytes by size, and in selected samples by staining for respective surface markers and flow cytometry analysis (CD62P, CD4, CD8, CD3). Activity of the respiratory system was analyzed in a two-channel titration injection respirometer at 37°C in MiRO5 (6). After a stabilization phase of 25 min malate (5mM) was added and plasma membrane was permeabilized with digitonin (16.2  $\mu$ M). Complex I oxidative phosphorylation activity (OXPHOS I) was measured after addition of pyruvate (5 mM), glutamate (10 mM) and ADP (5 mM), capacity of the oxidative phosphorylation system after addition of succinate (10 mM, OXPHOS I+II), capacity of the electron transport system (ETS) after subsequent uncoupling with p-trifluoromethoxy carbonyl cyanide phenyl hydrazone (FCCP,

1.5  $\mu\text{M}$ ), injected stepwise to avoid inhibitory effects. After rotenone addition (0.5  $\mu\text{M}$ ) maximum capacity of complex II (uncoupled, ETS II) was measured. Finally residual oxygen consumption was determined after myxothiazol addition (0.5  $\mu\text{M}$ ) and all respiratory parameters were corrected for.

#### **Determination of citrate synthase activity**

Citrate synthase activity was determined in CD3+ T cells taken directly from the oxygraph chamber at the end of the experiment. Samples were shock frozen and stored at  $-80^{\circ}\text{C}$  until analysis. After thawing specific CS activity (IU/ml) in the samples was quantified photometrically by a Nanodrop 2000c measuring the conversion of DTNB to TNB at 412 nm coupled to the CS-catalyzed reaction of acetyl-CoA and oxalacetate to citrate. Respiration rates, calculated as the time derivative of oxygen concentration ( $\text{pmol}/(\text{s}/10^6 \text{ cells})$ ), were normalized to CS activity ( $\text{pmol}/(\text{s}/10^6 \text{ cells IU CS activity})$ ).

#### **ELISA**

Interferon- $\gamma$  (IFN $\gamma$ ), soluble basigin and plasma cyclophilin A were determined by ELISA. IFN $\gamma$  as well as soluble basigin were measured in culture supernatants, the latter and Cyclophilin A were determined in plasma samples from COVID-19 patients and healthy controls. All ELISA measurements were carried out according to manufacturer's protocols.

#### **Electron microscopical analyses**

For transmission electron microscopic analyses, cell pellets were fixed in Karnovsky-fixative and enclosed with 4% low-melting-agarose. For the embedding process including post-fixation with osmium tetroxide, dehydration with ethanol, infiltration with EPON the LYNX microscopy tissue processor was used. Semi-thin-sections (750 nm), for the selection of relevant areas, and ultra-thin sections (80 nm) for the ultrastructural analyses were cut by use of the Reichert Ultracut S Microtome. Ultra-thin-sections were contrasted with aqueous 2%-uranyl-acetate- and 2%-lead-citrate solution for 10 minutes each. The Electron-microscopic analysis was performed using the LEO 912AB electron-microscope.

#### **Cell sorting and RNA-seq library preparation**

For RNASeq experiments, cryopreserved PBMC were thawed and stained with anti-CD3, anti-CD4, anti-CD8 and anti-CD14. Live, single cells with leukocyte FSC/SSC characteristics were sorted into CD14+CD3- monocytes and CD14-CD3+CD4+CD8- CD4 T cells by four-way sorting on a BD FACSAria IIu. Sorted cells were centrifuged and further processed for RNASeq immediately. Total cellular RNA was isolated from sorted blood cells using the RNeasy Micro Kit according with manufacturer's instructions. RNA was quantified using the NanoDrop and the quality was assessed using the RNA ScreenTape Kit. Generation of dsDNA libraries for Illumina sequencing was carried out using the SMART-Seq Stranded Kit according to manufacturer's instructions. The quality of dsDNA libraries was checked with the High Sensitivity D1000 ScreenTape Kit and concentrations were determined with the Qubit dsDNA HS Kit. Sequencing was performed using the Illumina NextSeq550 sequencer.

#### **RNA-seq analysis**

Sequencing reads were mapped to human (GRCh38) using STAR v2.5.3a (7). The human GRCh38 genome index incorporated gene annotation from GENCODE 44 (release 27) to aid in spliced alignment. Tables of raw uniquely mapped read counts per human gene were generated during mapping using the built-in --quantMode GeneCounts option in STAR. Differential expression analysis was carried out on raw gene counts using edgeR 3.20.8 (8) in R (3.4.3). Pairwise comparisons of indicated data sets were done using the quasi-likelihood test. Heatmaps of differentially expressed genes shown in Figure 2 used batch-corrected, normalized and scaled CPM (counts per million) data and were generated using the heatmap.2 function of the gplots package in R. Volcano plots were generated using the ggplot2 (v3.1.0) package in R. The rank-based gene set enrichment tests were



done using the `fry` function of the `limma` package (9) and plotted using the `barcodeplot` function in R. Gene-sets were defined in the hallmark gene set collection (10) and basigin interaction partners were defined by STRING (1).

### **Deconvolution analysis**

The deconvolution of our RNASeq bulks was carried out using Digital Tissue Deconvolution (DTD) (11) using machine learning techniques and relying on single cell data for training and constructing a reference matrix that defines the cell types that the bulks are deconvolved into. We used published scRNA-seq data from Ren et al. 2021 (2), obtained from the already quality controlled cells available at the repository (12). The data contains scRNA-seq measurements of approximately 1.6 million peripheral blood mononuclear cells (PBMCs) from 196 donors, including 25 healthy controls, 79 moderate and 92 severe COVID19 cases. Data were filtered for cells annotated as CD4+ and sequenced using the 10x 5' platform. Only fresh or frozen PBMCs and samples from cities which contributed more than one disease severity were kept. This filtering led to a for our purposes reasonably homogenous distribution of 208394 (CD4+) single cells that were used to train the DTD model. Neighborhood graphs were computed using the `scanpy` routine `pp.neighbors` (13), based on euclidean distance between the expression of all genes. Subsequently, Leiden clustering using a resolution parameter of 1 was performed, resulting in 14 clusters. Two non-negative DTD models for each of the two cell types were trained using the R-package DTD (14). We employed the full data set but restricted ourselves to the 2000 most variable genes across all single cells, and applied these models to the CD4+ sorted bulks cells to estimate their compositions in terms of our clustering. The results were cross-checked with different clusterings of varying resolutions and a resolution of 1 was found to be most stable in terms of the achievable residual for the non-negative estimation of cell subpopulations. Employing such a fine clustering led to some of the single cell populations not being found in bulk seq data, while others were estimated non-zero consistently across all available bulks (Figure 3A). Mann-Whitney test on the estimates for each cluster was performed to identify cluster 2 to be significantly different between samples from controls and severe COVID-19. KEGG (15), MetaCyc (16) and hallmark (10) databases were used to define metabolic genes sets. Gene set enrichment analysis was performed as published (17).

### List of reagents

| Antibody                                                                 | Source                                                 | Identifier          |
|--------------------------------------------------------------------------|--------------------------------------------------------|---------------------|
| Anti-Human CD3 (clone SK7)                                               | Invitrogen (Thermo Fisher Scientific; Waltham, MA, US) | Cat# 45-0036-42     |
| Anti-Human CD3 (clone SK7)                                               | BD Biosciences (Franklin Lakes, NJ, US)                | Cat# 341111/ 345763 |
| Anti-Human CD3 (clone SK7)                                               | BioLegend (San Diego, CA, US)                          | Cat# 344828         |
| Anti-Human CD3 (clone UCHT1)                                             | BD Biosciences                                         | Cat# 555335         |
| Anti-Human CD3 (clone SK7)                                               | BD Biosciences                                         | Cat# 345763         |
| Anti-Human CD3 (clone OKT3)                                              | BioLegend                                              | Cat# 317322         |
| Anti-Human CD3 (clone OKT3, for in vitro stimulation)                    | BD Biosciences                                         | Cat# 567118         |
| Anti-Human CD4 (clone SK3)                                               | BD Biosciences                                         | Cat# 345770         |
| Anti-Human CD4 (clone SK3)                                               | BioLegend                                              | Cat# 344624         |
| Anti-Human CD4 (clone RPA-T4)                                            | BD Biosciences                                         | Cat# 560345         |
| Anti-Human CD4 (clone SK3)                                               | BD Biosciences                                         | Cat# 563033         |
| Anti-Human CD8 (clone SK1)                                               | BioLegend                                              | Cat# 344712         |
| Anti-Human CD8 (clone SK1)                                               | BD Biosciences                                         | Cat# 560179         |
| Anti-Human CD8 (clone RPA-T8)                                            | BD Biosciences                                         | Cat# 558207         |
| Anti-Human CD11b (clone M1/70)                                           | BioLegend                                              | Cat# 101230         |
| Anti-Human CD14 (clone 63D3)                                             | BioLegend                                              | Cat# 367124         |
| Anti-Human CD16 (clone 3G8)                                              | BD Biosciences                                         | Cat# 555406         |
| Anti-Human CD25 (clone 2A3)                                              | BD Biosciences                                         | Cat# 341011         |
| Anti-Human CD45RA (clone HI100)                                          | BD Biosciences                                         | Cat# 563031         |
| Anti-Human CD45RO (clone UCHL1)                                          | BioLegend                                              | Cat# 304246         |
| Anti-Human CD56 (clone HCD56)                                            | BioLegend                                              | Cat# 318328         |
| Anti-Human CD62L (clone DREG-56)                                         | BioLegend                                              | Cat# 304860         |
| Anti-Human CD62L (clone DREG-56)                                         | BioLegend                                              | Cat# 304822         |
| Anti-Human CD62P (clone AK4)                                             | BioLegend                                              | Cat# 304906         |
| Anti-Human CD66b (clone G10F5)                                           | BioLegend                                              | Cat# 305112         |
| Anti-Human CD98 (clone REA387)                                           | Miltenyi Biotec (Bergisch Gladbach, Germany)           | Cat# 130-105-664    |
| Anti-Human CD147 (clone HIM6)                                            | BioLegend                                              | Cat# 306214         |
| Anti-Human CD147 (clone MEM-M6/6, for in vitro experiments)              | Abcam (Cambridge, UK)                                  | Cat# 119114         |
| Anti-Human CD197 (clone G043H7)                                          | BioLegend                                              | Cat# 353207         |
| Anti-Human CD279 (clone EH12.1)                                          | BD Biosciences                                         | Cat# 563076         |
| Anti-Human FOXP3 (clone PCH101)                                          | eBioscience (Thermo Fisher Scientific)                 | Cat# 12-4776-42     |
| Reagent                                                                  | Source                                                 | Identifier          |
| 2-[N-(7-nitrobenz-2-oxa-1,3-diazol-4-yl)amino]-2-deoxy-D-glucose (2NBDG) | Thermo Fisher Scientific                               | Cat# N13195         |
| 2,4,6-Tri(Dimethylaminomethyl)-Phenol                                    | EMS (Science Services, Munich, Germany)                | Cat# 13600          |

|                                                                                |                                                  |                   |
|--------------------------------------------------------------------------------|--------------------------------------------------|-------------------|
| 2',7'-Dichlorofluorescein diacetate (DCFDA)                                    | Sigma-Aldrich (St. Louis, MO, US)                | Cat# D6883        |
| 5,5'-dithio-bis(2-nitrobenzoic acid); 3-carboxy-4-nitrophenyl disulfide (DTNB) | Sigma-Aldrich                                    | Cat# D8130        |
| Acetyl coenzyme A, lithium salt                                                | Sigma-Aldrich                                    | Cat# A2181        |
| Adenosine 5' diphosphate (ADP) potassium salt                                  | Calbiochem (Merck Millipore, Darmstadt, Germany) | Cat# 117105       |
| Ammonium Chloride                                                              | Merck (Darmstadt, Germany)                       | Cat# 101145       |
| BODIPY 500/510 C1, C12                                                         | Thermo Fisher Scientific                         | Cat# D3823        |
| Brilliant Stain Buffer                                                         | BD Biosciences                                   | Cat# 563794       |
| Bovine serum albumine, essentially acid free                                   | Sigma-Aldrich                                    | Cat# A6003        |
| Carbonyl cyanide p-(trifluoromethoxy) phenyl-hydrazone (FCCP)                  | Sigma-Aldrich                                    | Cat# C2920        |
| Citrate synthase                                                               | Sigma-Aldrich                                    | Cat# C3260        |
| Cyclophilin A ELISA                                                            | Sigma-Aldrich                                    | Cat# RAB1402      |
| Cyclosporine A (Sandimmune® 50 mg/ml)                                          | Novartis (Basel, Schweiz)                        |                   |
| Dexamethasone 4 mg inject                                                      | Jenapharm, mibe GmbH (Jena, Germany)             |                   |
| Digitonin                                                                      | Fluka (Sigma-Aldrich)                            | Cat# 37008        |
| Diphenyleneiodonium chloride                                                   | Sigma-Aldrich                                    | Cat# D2926        |
| Dodecyl Succinic Anhydride                                                     | EMS                                              | Cat# 13710        |
| Dulbeccos Phosphate Buffered Saline (DPBS)                                     | Gibco (Thermo Fisher Scientific)                 | Cat# 14190-094    |
| Dynabeads Human T-Activator CD3/CD28                                           | Gibco                                            | Cat# 11132D       |
| EMbed 812                                                                      | EMS                                              | Cat# 14900        |
| Ethanol                                                                        | Sigma-Aldrich                                    | Cat# 32205        |
| Ethylendiamine-tetraacetic-acid disodium salt dihydrate                        | Sigma-Aldrich                                    | Cat# E5134        |
| Ethylenglycol-tetraacetic-acid                                                 | Sigma-Aldrich                                    | Cat# E4378        |
| Fetal Calf Serum                                                               | Sigma-Aldrich                                    | Cat# F7524-500 ML |
| Fixable Viability Dye eF780                                                    | eBioscience                                      | Cat# 65-0865-14   |
| Hanks Buffered Salt Solution                                                   | Sigma-Aldrich                                    | Cat# H6648        |
| HEPES                                                                          | Sigma-Aldrich                                    | Cat# H7523        |
| HS D1000 Screen Tape                                                           | Agilent Technologies (Santa Clara, CA USA)       | Cat# 5067-5584    |
| HS D1000 Screen Tape buffer                                                    | Agilent Technologies                             | Cat# 5067-5585    |
| Human CD147/EMMPRIN ELISA Kit                                                  | Thermo Fisher Scientific                         | Cat# EH78RB       |
| Human Cyclophilin A Recombinant Protein                                        | Invitrogen                                       | Cat# RP020        |
| Human IFN-γ DuoSet ELISA                                                       | R&D Systems (Minneapolis, MN, USA)               | Cat# DY285B       |
| Intracellular Fixation and Permeabilization Buffer Set                         | eBioscience                                      | Cat# 88-8824-00   |

|                                                |                                                                                                |                  |
|------------------------------------------------|------------------------------------------------------------------------------------------------|------------------|
| Karnovsky-Fixative                             | Institute for Pathology, University Hospital Regensburg                                        |                  |
| L-Glutamic acid, sodium salt                   | Sigma-Aldrich                                                                                  | Cat# G1626       |
| L-Glutamine                                    | PAN Biotech (Aidenbach, Germany)                                                               | Cat# P04-80050   |
| L-Malic acid                                   | Sigma-Aldrich                                                                                  | Cat# M1000       |
| low melting agarose                            | Invitrogen                                                                                     | Cat# 15510-027   |
| Magnesium chloride hexahydrate                 | Scharlau (Scharlab, Barcelona, Spain)                                                          | Cat# MA0036      |
| Methyl-5-Norbornene-2,3-Dicarboxylic Anhydride | EMS                                                                                            | Cat# 1900        |
| MitoSOX Red mitochondrial superoxide indicator | Invitrogen                                                                                     | Cat# M36008      |
| Mitotracker Green FM                           | Invitrogen                                                                                     | Cat# M7514       |
| Myxothiazol                                    | Sigma-Aldrich                                                                                  | Cat# T-5580      |
| Osmium tetroxide                               | EMS                                                                                            | Cat# 19110       |
| Pan T Cell Isolation Kit, human                | Miltenyi Biotec                                                                                | Cat# 130-096-535 |
| Penicillin Streptomycin                        | Gibco                                                                                          | Cat# 15140-122   |
| PepTivator <sup>®</sup> SARS-CoV-2 Prot_M      | Miltenyi Biotec                                                                                | Cat# 130-126-703 |
| PepTivator <sup>®</sup> SARS-CoV-2 Prot_N      | Miltenyi Biotec                                                                                | Cat# 130-126-699 |
| PepTivator <sup>®</sup> SARS-CoV-2 Prot_S      | Miltenyi Biotec                                                                                | Cat#130-126-701  |
| Potassium dihydrogen phosphate                 | Merck                                                                                          | Cat# 104873      |
| Potassium hydroxide                            | Sigma-Aldrich                                                                                  | Cat# P1767       |
| Potassium lactobionate                         | Sigma-Aldrich                                                                                  | Cat# 153516      |
| Pyruvic acid, sodium salt                      | Sigma-Aldrich                                                                                  | Cat# P2256       |
| Recombinant SARS-CoV-2 Spike Protein           | Sino Biological Inc. (Peking, China)                                                           | Cat# 40589-V08B1 |
| RNA Screen Tape                                | Agilent Technologies                                                                           | Cat# 5067-5579   |
| RNA Screen Tape buffer                         | Agilent Technologies                                                                           | Cat# 5067-5580   |
| RNeasy Micro Kit                               | Qiagen (Hilden, Germany)                                                                       | Cat# 74004       |
| Rotenone                                       | Sigma-Aldrich                                                                                  | Cat# R8875       |
| RPMI 1640                                      | Gibco (Thermo Fisher Scientific)                                                               | Cat# 31870-025   |
| SARS-CoV-2 RBD B1.351 Protein                  | P. Neckermann, AG Wagner, Institute of Medical Microbiology and Hygiene, University Regensburg |                  |
| SMART-Seq Stranded Kit                         | Takara Bio Inc. (Kusatsu, Japan)                                                               | Cat# 634444      |
| Stable Glutamine                               | PAN Biotech                                                                                    | Cat# P04-82050   |
| Succinate disodium salt, hexahydrate           | Sigma-Aldrich                                                                                  | Cat# S2378       |
| Sucrose                                        | Carl Roth (Karlsruhe, Germany)                                                                 | Cat# 4621.1      |
| Taurine                                        | Sigma-Aldrich                                                                                  | Cat# T0625       |
| Triethanol amine                               | Fluka                                                                                          | Cat# 90279       |
| Tris - (hydroxymethyl) - aminomethan           | Merck                                                                                          | Cat# 8382        |
| Triton X-100                                   | Serva (Heidelberg, Germany)                                                                    | Cat# 37238       |
| T-SPOT.TB test                                 | Oxford Immunotec International (Abingdon, UK)                                                  | Cat# TB.300      |
| Qubit dsDNA HS Kit                             | Thermo Fisher Scientific                                                                       | Cat# Q33231      |

| <b>Devices</b>                                        | <b>Source</b>                                          |                                                                                                                         |  |
|-------------------------------------------------------|--------------------------------------------------------|-------------------------------------------------------------------------------------------------------------------------|--|
| BD FACSAria IIu                                       | Beckton Dickinson                                      | (Heidelberg, Germany)                                                                                                   |  |
| BD FACSCelesta Flow Cytometer                         | Beckton Dickinson                                      | (Heidelberg, Germany)                                                                                                   |  |
| BD LSRFortessa™ Flow Cytometer                        | Beckton Dickinson                                      | (Heidelberg, Germany)                                                                                                   |  |
| CASY Cell Counter System                              | OMNI Life Science (Bremen, Germany)                    |                                                                                                                         |  |
| EliSpot Robotic System ELROB05i, Software Version 7.0 | AID Advanced Imaging Devices GmbH (Straßberg, Germany) |                                                                                                                         |  |
| Illumina NextSeq550 Sequencer                         | Illumina (San Diego, CA, USA)                          |                                                                                                                         |  |
| LEO 912AB electron-microscope                         | Zeiss (Oberkochen, Germany)                            |                                                                                                                         |  |
| LYNX microscopy tissue processor                      | Reichert-Jung (Wetzlar, Germany)                       |                                                                                                                         |  |
| Megafuge 3.0R                                         | Haereus (Hanau, Germany)                               |                                                                                                                         |  |
| Nanodrop                                              | peqLab (Erlangen, Germany)                             |                                                                                                                         |  |
| Nanodrop 2000c                                        | ThermoFisher                                           |                                                                                                                         |  |
| Oxygraph-2k                                           | Oroboros Instruments                                   | (Innsbruck, Austria)                                                                                                    |  |
| Reichert Ultracut S Microtome                         | Reichert-Jung                                          |                                                                                                                         |  |
| Tecan Spark                                           | Tekan Group AG                                         | (Männerdorf, Switzerland)                                                                                               |  |
| Whitley H35 Hyxpoystation                             | Meintrup DWS (Herzlake, Germany)                       |                                                                                                                         |  |
| <b>Software</b>                                       | <b>Source</b>                                          | <b>Identifier</b>                                                                                                       |  |
| edgeR 3.20.8                                          |                                                        | (8)                                                                                                                     |  |
| R-package DTD                                         |                                                        | <a href="https://www.liebertpub.com/doi/10.1089/cmb.2019.0469">https://www.liebertpub.com/doi/10.1089/cmb.2019.0469</a> |  |
| DatLab5                                               | Oroboros Instruments                                   |                                                                                                                         |  |
| FlowJo (V 9.9.6, 10.6.2, 10.7.1)                      | Tree Star Inc (BD Life sciences)                       | <a href="https://www.flowjo.com">https://www.flowjo.com</a>                                                             |  |
| ggplot2 (v3.1.0)                                      |                                                        |                                                                                                                         |  |
| Prism                                                 | GraphPad                                               |                                                                                                                         |  |
| STAR (v2.5.3a)                                        |                                                        | (7)                                                                                                                     |  |
| STRING                                                |                                                        | (1)                                                                                                                     |  |

## References

1. Szklarczyk D, et al. STRING v11: protein-protein association networks with increased coverage, supporting functional discovery in genome-wide experimental datasets. *Nucleic Acids Res.* 2019;47(D1):D607-D13.
2. Ren X, et al. COVID-19 immune features revealed by a large-scale single-cell transcriptome atlas. *Cell.* 2021;184(7):1895-913 e19.
3. Song JW, et al. Omics-Driven Systems Interrogation of Metabolic Dysregulation in COVID-19 Pathogenesis. *Cell metabolism.* 2020;32(2):188-202 e5.
4. Hadjadj J, et al. Impaired type I interferon activity and inflammatory responses in severe COVID-19 patients. *Science.* 2020;369(6504):718-24.
5. Hitzentbichler F, et al. Comparison of Throat Washings, Nasopharyngeal Swabs and Oropharyngeal Swabs for Detection of SARS-CoV-2. *Viruses.* 2021;13(4).
6. Pesta D, and Gnaiger E. High-resolution respirometry: OXPHOS protocols for human cells and permeabilized fibers from small biopsies of human muscle. *Methods in molecular biology.* 2012;810:25-58.
7. Dobin A, et al. STAR: ultrafast universal RNA-seq aligner. *Bioinformatics.* 2013;29(1):15-21.
8. Robinson MD, et al. edgeR: a Bioconductor package for differential expression analysis of digital gene expression data. *Bioinformatics.* 2010;26(1):139-40.
9. Ritchie ME, et al. limma powers differential expression analyses for RNA-sequencing and microarray studies. *Nucleic Acids Res.* 2015;43(7):e47.
10. Liberzon A, et al. The Molecular Signatures Database (MSigDB) hallmark gene set collection. *Cell systems.* 2015;1(6):417-25.
11. Gortler F, et al. Loss-Function Learning for Digital Tissue Deconvolution. *Journal of computational biology : a journal of computational molecular cell biology.* 2020;27(3):342-55.
12. <http://covid19.cancer-pku.cn/>. Downloaded on Feb/25/2021.
13. Wolf FA, et al. SCANPY: large-scale single-cell gene expression data analysis. *Genome biology.* 2018;19(1):15.
14. Schon M, et al. DTD: An R Package for Digital Tissue Deconvolution. *Journal of computational biology : a journal of computational molecular cell biology.* 2020;27(3):386-9.
15. Kanehisa M, and Goto S. KEGG: kyoto encyclopedia of genes and genomes. *Nucleic acids research.* 2000;28(1):27-30.
16. Caspi R, et al. The MetaCyc database of metabolic pathways and enzymes and the BioCyc collection of pathway/genome databases. *Nucleic acids research.* 2016;44(D1):D471-80.
17. Korotkevich G, et al. Fast gene set enrichment analysis. *bioRxiv.* 2021:060012.

RNA seq data, complementary to Figure 2A (CD4+ T cells)

| GeneSymbol | ICU          | ICU          | ICU          | ICU          | Rec          | Rec          | Con          | Con           | Con           | Con          | EnsemblID          | clusterID |
|------------|--------------|--------------|--------------|--------------|--------------|--------------|--------------|---------------|---------------|--------------|--------------------|-----------|
| FURIN      | -0.193712896 | 0.704229634  | 0.938222212  | 1.985280448  | -0.289678496 | 0.4776285    | -0.944534286 | -1.023013352  | -0.940429526  | -0.713992237 | ENSG00000140564.11 | 1         |
| PEL1       | -0.092616173 | 0.780581422  | 0.996166111  | 1.543897753  | 0.018810744  | 0.743957856  | -1.493723697 | -1.00082824   | -0.971713988  | -0.524561787 | ENSG00000139946.9  | 1         |
| VDAC1      | 0.239490669  | 0.714690143  | 0.872335952  | 1.928626207  | -0.055030627 | 0.052743515  | -1.162492318 | -1.32551157   | -0.768786436  | -0.496065536 | ENSG00000213585.10 | 1         |
| STAT3      | -0.363870891 | 0.73310223   | 0.938670351  | 1.691650689  | 0.23118162   | 0.601653235  | -1.124662709 | -1.164771517  | -0.860226971  | -0.782726036 | ENSG00000168610.14 | 1         |
| PP1R16B    | -0.547209812 | 0.899671108  | 0.955295312  | 1.769645308  | 0.034866655  | 0.443803803  | -1.0775118   | -1.321239278  | -0.388440297  | -0.768289097 | ENSG00000101445.9  | 1         |
| SEC14L1    | -0.340721557 | 0.170755062  | 0.716104906  | 1.708046903  | -0.006010001 | 0.666057287  | -0.778456    | -1.274763563  | -0.731879278  | -1.040833758 | ENSG00000129657.14 | 1         |
| SLC04A1    | -0.668657304 | 0.841257973  | 0.245592167  | 1.216156256  | -0.290005151 | 0.917105463  | -0.592157634 | -1.246337223  | -0.975731778  | -0.412630317 | ENSG00000101187.15 | 1         |
| EZR        | -0.020287628 | 0.907455586  | 0.149850859  | 2.025246149  | 0.161321291  | 0.428971348  | -1.3143948   | -0.992912275  | -1.007017684  | -0.338232846 | ENSG00000092820.17 | 1         |
| RELB       | -0.71640233  | 0.1018956391 | 1.485128296  | 1.024839172  | 0.304367506  | 0.599605136  | -1.012989902 | -1.130196366  | -1.102317575  | -0.470990328 | ENSG00000104856.13 | 1         |
| SBN02      | -0.602403192 | 1.19519346   | 1.329375227  | 1.218630853  | 0.026719881  | 0.440305672  | -0.79708087  | -1.333742045  | -1.096809097  | -0.380189889 | ENSG00000064932.15 | 1         |
| YES1       | -0.298750942 | 0.202851166  | 0.378035083  | 1.574587101  | 0.520875901  | 0.509635363  | -1.302255071 | -1.17301683   | -0.852972025  | -0.519029746 | ENSG00000176105.13 | 1         |
| MCM6       | -0.31973111  | 0.81154334   | 1.44401271   | 1.52779454   | 1.26864256   | 0.583092432  | -0.979724851 | -1.226219003  | -1.034605448  | -0.570026421 | ENSG00000076003.4  | 1         |
| BATF       | -0.169648749 | 1.442681803  | 1.591199978  | 0.249145496  | 0.255156149  | 0.492678628  | -1.343092854 | -0.979052752  | -0.625913888  | -0.913153809 | ENSG00000156127.6  | 1         |
| DUSP5      | 0.306253281  | 1.131949487  | 1.511980621  | 0.317520228  | 0.159444593  | 0.882898665  | -1.071042574 | -0.83895868   | -1.273311811  | -1.046725011 | ENSG00000138166.5  | 1         |
| PIM3       | -0.284977891 | 0.928670407  | 1.623551654  | 0.316458234  | 0.470709644  | 0.900232588  | -0.911767992 | -1.376344259  | -0.964257011  | -0.782626375 | ENSG00000198355.8  | 1         |
| LRP8       | 0.041335606  | 1.125340749  | 1.754297469  | 0.175761666  | 0.204301337  | 0.570804665  | -0.693053398 | -1.389824468  | -1.243580032  | -0.545401614 | ENSG00000151793.15 | 1         |
| BCL6       | -0.133036443 | 1.060372253  | 1.230278498  | 0.601326085  | 0.609196906  | 0.854997725  | -1.561146202 | -1.117660752  | -0.801947848  | -0.742380222 | ENSG00000113991.17 | 1         |
| BCL3       | 0.04952113   | 1.045792629  | 1.274554306  | 0.68514056   | 0.474939784  | 0.839604883  | -1.257918334 | -1.128116146  | -0.821940067  | -1.128147845 | ENSG00000069399.14 | 1         |
| SPS1       | 0.159967774  | 1.278757209  | -0.095586757 | 2.097276645  | 0.009496249  | -0.418838377 | -1.324375886 | -0.68801584   | -0.579253316  | -0.4394277   | ENSG00000171621.13 | 1         |
| CSMTM6     | 0.040345256  | 1.318012894  | 0.105624495  | 1.448470332  | 0.059460708  | -0.828178453 | -1.507946266 | -0.135918348  | -0.37359906   | -1.006451558 | ENSG00000091317.7  | 1         |
| LDLR       | -0.10301996  | 1.933661506  | 0.807955881  | 0.906857883  | 0.146145914  | 0.116439267  | -1.184325052 | -0.981605641  | -0.70747309   | -0.934636707 | ENSG00000130164.13 | 1         |
| FRMD4B     | -0.117854728 | 1.837542076  | 0.885285315  | 0.923450467  | -0.20443369  | 0.195797903  | -1.370203776 | -0.165625311  | -0.891953016  | -1.091995661 | ENSG00000114541.14 | 1         |
| PGAP1      | -0.20707141  | 1.268419912  | 1.427239959  | 1.106913082  | 0.389933372  | -0.231945814 | -1.02597006  | -0.601217333  | -1.383665035  | -0.742636692 | ENSG00000197121.14 | 1         |
| NAMPT      | -0.194041502 | 1.074785284  | 1.653071853  | 0.811171237  | 0.469730327  | 0.034218758  | -1.408420208 | -0.638725477  | -1.199505048  | -0.602831225 | ENSG00000105835.11 | 1         |
| RYPB       | -0.364754337 | 1.051367307  | 1.061271649  | 1.540227243  | 0.698127071  | 0.194021257  | -1.4416974   | -0.83550303   | -0.749678201  | -0.853381527 | ENSG00000163620.10 | 1         |
| STX11      | -0.304861087 | 1.194414062  | 1.351606826  | 1.244213414  | 0.25592813   | 0.167833963  | -1.341421365 | -0.882355925  | -0.759974096  | -0.925383921 | ENSG00000135604.9  | 1         |
| TCAF2      | -0.321264384 | 0.962376265  | 1.520020019  | 1.161286913  | 0.379175164  | 0.249814356  | -1.300419492 | -0.676985099  | -1.048835854  | -0.925167887 | ENSG00000170379.19 | 1         |
| GREM2      | -0.236684725 | 0.623580905  | 0.70622044   | 1.457523063  | 0.563736653  | -0.036848559 | -1.34139382  | -0.328968405  | -1.1725718902 | -0.732666323 | ENSG00000180875.4  | 1         |
| HMG3B      | 0.245136166  | 0.458468096  | 1.366817302  | 1.155107687  | 0.613478997  | 0.167930148  | -1.256211372 | -0.375534905  | -1.727425971  | -0.647766148 | ENSG00000029993.14 | 1         |
| CTPS1      | -0.409964951 | 0.40272872   | 1.04236565   | 1.259124052  | -0.17223775  | 0.110124885  | -0.490025032 | -1.021216252  | -1.337805047  | -1.072497808 | ENSG00000117193.13 | 1         |
| TAF4B      | -0.333807256 | 1.224355207  | 1.481124108  | 1.399510519  | -0.44181051  | 0.136439085  | -0.908880795 | -0.785914906  | -0.96094701   | -0.810068441 | ENSG00000141384.12 | 1         |
| EDA        | -0.909493542 | 0.986007926  | 1.391802747  | 1.409582175  | 0.360060818  | 0.120362004  | -0.420738494 | -1.196400178  | -0.963810146  | -0.773318508 | ENSG00000158813.17 | 1         |
| ELMO2      | -0.227551176 | 1.032750481  | 1.389726294  | 1.031489069  | -0.562247344 | 0.607690258  | -0.624759313 | -1.190142709  | -0.785559401  | -0.991085429 | ENSG00000062598.17 | 1         |
| EPD1       | 0.214463076  | 1.372422978  | 1.205283776  | 1.472593555  | -0.39661888  | -0.676361085 | -0.706814347 | -0.785671582  | -1.219632291  | -0.479672192 | ENSG00000122547.10 | 1         |
| NOP16      | -0.035463672 | 0.862194677  | 1.373659703  | 1.468711581  | -0.352038854 | 0.344847083  | -0.906320915 | -0.760269616  | -1.572339412  | -0.532989916 | ENSG00000048162.20 | 1         |
| GPRIN3     | -0.251548932 | 1.313454146  | 1.088733904  | 1.464495023  | 0.135358446  | 0.127657274  | -0.952186897 | -0.737369994  | -1.121790849  | -1.066802121 | ENSG00000185477.4  | 1         |
| RAB11FIP1  | -0.104629688 | 1.431172843  | 0.4692725    | 1.592839407  | 0.153784004  | 0.410456643  | -1.04909422  | -0.755369721  | -1.153835243  | -0.998781143 | ENSG00000156675.15 | 1         |
| IL2RA      | 0.06164513   | 1.413319043  | 0.122647078  | 1.646790601  | 0.442258501  | 0.182713224  | -1.126441576 | -0.621907197  | -1.316335849  | -0.604668955 | ENSG00000134460.15 | 1         |
| GNL2       | -0.366043499 | 0.994681735  | 0.57562595   | 1.992830122  | 0.251864674  | 0.103589982  | -0.430291867 | -1.058654163  | -1.211786435  | -0.851753143 | ENSG00000134697.12 | 1         |
| SNX9       | -0.563379866 | 1.029047889  | 0.842935172  | 1.814081292  | 0.104958048  | 0.325587818  | -0.644932459 | -0.638932165  | -1.364929164  | -0.904435655 | ENSG00000130340.15 | 1         |
| KPNA2      | 0.466202712  | 0.364446781  | 1.627050939  | 0.849177236  | 0.5373255404 | 0.25333824   | -0.590736756 | -0.764927967  | -1.632529484  | -1.137272689 | ENSG00000182481.8  | 1         |
| TBC1D15    | 0.02503692   | 0.088006469  | 1.699759591  | 1.051552138  | 0.489189654  | 0.544648243  | -1.281610964 | -0.279931917  | -1.238607241  | -1.098043072 | ENSG00000121749.15 | 1         |
| DBX1       | -0.087870599 | 0.645097722  | 1.075294282  | 1.3842677    | 0.069820836  | 0.051422545  | -0.689156565 | -0.886676824  | -1.296578166  | -0.985620429 | ENSG00000165732.12 | 1         |
| SLC16A1    | 0.045209011  | 0.911595804  | 1.532391176  | 1.329633124  | 0.221685612  | -0.067289599 | -0.981572493 | -0.815904539  | -1.110292926  | -1.06545517  | ENSG00000155380.11 | 1         |
| RIOK1      | 0.009076092  | 0.651122979  | 1.919653599  | 0.804182677  | -0.034788215 | 0.573265687  | -0.897472404 | -0.84868076   | -1.189042557  | -0.987317099 | ENSG00000124784.8  | 1         |
| B3GNT2     | 0.940152003  | 0.616883480  | 1.865680817  | -0.638264549 | 0.324879234  | 0.237747201  | -1.040854944 | -0.649902404  | -0.768445356  | -1.107862604 | ENSG00000170340.10 | 1         |
| TIMM23     | 0.255795326  | 0.377049134  | 1.546134426  | 1.611471443  | 0.337233594  | -0.331419546 | -1.131330591 | -0.704451706  | -0.867096709  | -1.043385271 | ENSG00000265354.3  | 1         |
| UBASH3B    | -0.566534481 | 0.730171792  | 1.403994229  | 1.825168803  | 0.21793554   | -0.356746688 | -1.206755709 | -0.675810482  | -0.632106826  | -0.582162606 | ENSG00000154127.9  | 1         |
| MTHFD1L    | 0.617320503  | 0.700320824  | 0.706222231  | 1.903370409  | 0.085122838  | -0.128493874 | -0.745207968 | -0.810099768  | -0.990410386  | -1.33814481  | ENSG00000120254.15 | 1         |
| PAK1IP1    | 0.39432387   | 0.420178671  | 1.196028733  | 1.953882645  | 0.043284706  | -0.615415612 | -0.692405507 | -0.570796354  | -1.156642651  | -0.954438051 | ENSG00000118454.4  | 1         |
| HDCGF1     | 0.749005518  | 0.500970797  | 0.43533995   | 1.433906972  | 0.557879428  | 0.622596179  | -0.976657652 | -0.845459501  | -0.730547755  | -1.743273253 | ENSG00000166503.8  | 1         |
| VAV3       | 0.387782472  | 0.89650152   | -0.162882672 | 1.861583512  | 0.148503744  | 0.601719676  | -0.685343122 | -0.742248952  | -0.657225489  | -1.648090699 | ENSG00000134215.15 | 1         |
| RCOR1      | 0.445582246  | 1.778822529  | -0.06656215  | 1.476477912  | -0.169271591 | -0.07546566  | -0.250741205 | -0.977538312  | -0.9012445    | -1.620075221 | ENSG00000180198.15 | 1         |
| AL138963.3 | -0.035599889 | 0.99552121   | 0.375592806  | 1.394120066  | 0.165227454  | 0.961505215  | -0.376817648 | -0.439129584  | -1.435548827  | -1.604870803 | ENSG00000273149.1  | 1         |
| CNP        | 0.330576999  | 0.7973125    | 1.363232958  | 0.796389813  | -0.052781327 | 0.8786991    | -0.276726667 | -1.279671646  | -1.323958217  | -1.230735112 | ENSG00000173786.16 | 1         |
| PLXNA4     | 0.158312135  | 0.64126317   | 0.55535698   | 1.776634317  | 0.207723251  | 0.807677723  | -0.873023113 | -1.0412581765 | -1.25747851   | -1.044160513 | ENSG00000221866.9  | 1         |
| GAB2       | 0.264875988  | 0.973366781  | 0.97736727   | 1.281605412  | 0.203954324  | 0.683249904  | -0.950837232 | -1.128939049  | -1.297106706  | -1.007536692 | ENSG0000033327.12  | 1         |
| GNA15      | 0.39361474   | 0.950975374  | 0.549933363  | 1.25909692   | 0.217134624  | 0.90606963   | -1.026903854 | -0.783286309  | -1.655525033  | -0.864646793 | ENSG00000060558.3  | 1         |
| SFXN1      | 0.266463667  | 0.301635797  | 0.918767751  | 1.460021115  | 0.237152231  | 0.107332669  | -0.763659743 | -1.163384159  | -1.132941802  | -1.197387527 | ENSG00000164466.12 | 1         |
| LMMB1      | 0.255811364  | 0.492510877  | 0.859099487  | 1.369851036  | 0.600769502  | 0.83448033   | -0.980288227 | -1.376494564  | -0.853826731  | -1.199690776 | ENSG00000113368.11 | 1         |
| CORO1B     | 0.987307335  | 0.104499685  | 0.889897198  | 1.562424866  | 0.024663524  | 0.878016235  | -1.216080688 | -0.215807811  | -1.456714368  | -1.005192976 | ENSG00000172725.13 | 1         |
| ERMN       | 0.327052963  | 0.709081634  | 0.493004368  | 1.245        |              |              |              |               |               |              |                    |           |

RNA seq data, complementary to Figure 2B (CD14<sup>+</sup> monocytes)

| GeneSymbol | Severe       | Severe      | Severe       | Severe      | Rec          | Rec          | Con          | Con          | Con          | Con          | EnsemblID          | clusterID |
|------------|--------------|-------------|--------------|-------------|--------------|--------------|--------------|--------------|--------------|--------------|--------------------|-----------|
| TLNRP1     | -0.380623594 | 0.932091751 | 1.264917169  | 1.704693952 | -0.538707821 | 0.236256588  | -0.216889598 | -1.222196544 | -0.960905559 | -0.818636343 | ENSG00000140406.3  | 1         |
| SWAP70     | -0.298153055 | 0.671236222 | 1.309801415  | 1.554751904 | -0.499756762 | 0.316979488  | -0.395668263 | -0.928046564 | -1.011690683 | -1.118019382 | ENSG00000133789.14 | 1         |
| SYF2       | -0.11083115  | 1.128937812 | 1.374964349  | 1.308394068 | -0.67306582  | 0.172847206  | 0.039167113  | -1.336109178 | -1.070454142 | -0.833850258 | ENSG00000117614.9  | 1         |
| TUBB6      | -0.334832648 | 0.834186307 | 1.296397561  | 1.598981723 | 0.137157912  | 0.172025087  | -0.386832167 | -1.276287919 | -0.8695275   | -1.171200681 | ENSG00000176014.12 | 1         |
| USF2       | -0.379997484 | 0.871066842 | 1.500840314  | 1.542751314 | -0.217073564 | -0.544056562 | -0.171995663 | -1.106388038 | -0.915382146 | -1.113911786 | ENSG00000105698.15 | 1         |
| PLEKH02    | 0.408393749  | 0.481781886 | 1.083553988  | 1.942026822 | -0.466457175 | 0.167407319  | -0.593663405 | -1.07564667  | -0.927279811 | -1.020116003 | ENSG00000241839.9  | 1         |
| EHD4       | 0.43713127   | 0.543582414 | 1.082891676  | 1.866287014 | -0.204399226 | 0.006270137  | -0.452822694 | -1.225699038 | -1.044613802 | -1.00862775  | ENSG00000103966.10 | 1         |
| THBD       | -0.005603479 | 0.633332776 | 1.059811137  | 1.912766827 | -0.474524427 | 0.426713895  | -0.506053915 | -1.21536961  | -0.908643253 | -0.922429953 | ENSG00000178726.6  | 1         |
| PLAC8      | 0.335044827  | 0.907113759 | 1.147262982  | 1.816167288 | -0.58214452  | -0.141888064 | -0.676392552 | -0.850902521 | -0.970855291 | -0.983405907 | ENSG00000145287.10 | 1         |
| CD63       | 0.436647956  | 0.885207921 | 0.963034817  | 1.783766018 | -0.626370702 | 0.17583146   | -0.670963205 | -1.243411152 | -1.007808706 | -1.002865037 | ENSG00000135404.11 | 1         |
| ANAPC15    | 0.093316341  | 1.286359838 | 1.183544071  | 1.472931568 | 0.141899656  | -0.622037056 | -0.673542938 | -1.094039621 | -0.660363621 | -1.128068238 | ENSG00000110200.8  | 1         |
| PSMD7      | 0.184444576  | 1.313424609 | 0.962197552  | 1.549320094 | -0.109167247 | -0.189110019 | -0.479020274 | -1.334476964 | -0.781110665 | -1.116501663 | ENSG00000103035.10 | 1         |
| UBE21      | 0.053184457  | 1.442881254 | 1.588860881  | 0.969803253 | -0.30507287  | -0.247585241 | -0.583448828 | -1.212798025 | -0.731074241 | -0.974750642 | ENSG00000198833.6  | 1         |
| CALM3      | 0.240957342  | 1.444367532 | 1.458916498  | 0.968211089 | -0.433101242 | -0.302978089 | -0.202721472 | -1.254297278 | -0.795084893 | -1.124269487 | ENSG00000160014.16 | 1         |
| PRDM4      | -0.301070779 | 1.581208312 | 1.142967824  | 1.399477307 | -0.841098326 | -0.244803119 | -0.349772223 | -0.849782278 | -0.349636328 | -1.18749039  | ENSG00000110851.11 | 1         |
| RPL36AL    | 0.101783419  | 1.401596987 | 1.045568178  | 1.459550112 | -0.252431675 | -0.449557292 | -0.091211854 | -1.045290969 | -0.884472443 | -1.045290969 | ENSG00000165502.6  | 1         |
| PDAP1      | 0.19562643   | 1.644336339 | 0.926912038  | 1.202521705 | -0.440662748 | -0.36683582  | 0.109789147  | -1.101127586 | -0.932239376 | -1.236520129 | ENSG00000106244.12 | 1         |
| CHMP4B     | 0.14549202   | 1.782264206 | 0.795680632  | 1.08082179  | 0.14091631   | -0.681515981 | -0.020165325 | -1.153786029 | -1.054440088 | -1.074217525 | ENSG00000104211.3  | 1         |
| S100A6     | 0.297522911  | 1.348799552 | 0.516901453  | 1.863223023 | -0.283102296 | -0.18405807  | -0.921052892 | -0.681623805 | -0.899889652 | -1.056720224 | ENSG00000197956.9  | 1         |
| CORO1C     | 0.054679216  | 1.344317564 | 0.393636925  | 1.97761536  | -0.637364836 | 0.040768262  | -0.557883496 | -0.73391322  | -0.722457344 | -1.159398431 | ENSG00000110880.10 | 1         |
| MYL6       | 0.11322813   | 1.764791884 | 0.175928435  | 1.634530719 | -0.546123889 | -0.031065757 | -0.22770353  | -0.846399    | -0.89148012  | -1.143801556 | ENSG00000092841.18 | 1         |
| FLNB       | 0.057881663  | 1.407137356 | 0.071651241  | 1.758525564 | -0.398154125 | 0.614272748  | -0.903212461 | -0.439316236 | -1.19070158  | -0.978084169 | ENSG00000136068.14 | 1         |
| COX6C      | 0.258274451  | 1.137744396 | 0.198568653  | 2.097619147 | -0.488111061 | -0.315073963 | -0.495245872 | -1.380511363 | -0.192434857 | -0.820829532 | ENSG00000164919.10 | 1         |
| RNASE2     | 0.382200621  | 1.809815629 | -0.217399992 | 1.494841588 | -0.185687222 | 0.186222221  | -0.700856739 | -0.93858936  | -1.215203892 | -0.615342855 | ENSG00000169385.2  | 1         |
| TPM4       | 0.210465399  | 1.680611874 | 0.335066164  | 1.201514564 | -0.033370512 | 0.436486257  | -0.256373839 | -1.358815322 | -1.20051087  | -1.05073714  | ENSG00000167460.14 | 1         |
| TMED9      | 0.532404614  | 1.738797647 | 0.578788527  | 1.074958738 | -0.160897572 | 0.077719237  | -1.333038334 | -0.412846176 | -1.163839109 | -0.932047572 | ENSG00000184800.11 | 1         |
| COX5B      | 0.352871255  | 1.737687841 | 0.526252695  | 1.377265846 | -0.300877559 | 0.266647949  | -1.119213472 | -0.32927737  | -0.742658186 | -1.391989898 | ENSG00000135940.6  | 1         |
| RGL1       | -0.996156069 | 0.976509809 | 1.409753249  | 1.751090315 | -0.199420605 | -0.569999593 | -0.214568113 | -0.590194323 | -0.701125363 | -0.865892927 | ENSG00000143344.14 | 1         |
| AVP1       | 0.08997243   | 1.041991717 | 1.213908885  | 1.80715968  | -0.242533974 | 0.937982234  | -0.421310006 | -0.731596832 | -0.642859509 | -1.052710006 | ENSG00000119986.6  | 1         |
| PNMA1      | -0.692028268 | 1.126320105 | 1.12795369   | 1.900709311 | -0.483083125 | -0.463582169 | -0.446262102 | -1.118149691 | -0.567597302 | -0.384280448 | ENSG00000176903.4  | 1         |
| ARF6       | -0.594839204 | 1.030271234 | 1.019298935  | 2.009512358 | -0.082932717 | -0.596488192 | -0.589900098 | -1.068808385 | -0.461761631 | -0.664352299 | ENSG00000165527.7  | 1         |
| RAB11FIP4  | 0.223903033  | 0.536604649 | 1.353578884  | 2.030508101 | -0.708466642 | -0.534867515 | -0.914415951 | -0.739194864 | -0.272837147 | -0.78343537  | ENSG00000131242.17 | 1         |
| HMOX1      | -0.354903569 | 0.325126705 | 1.033464944  | 2.355707998 | -0.65708794  | -0.497373874 | -0.920064843 | -0.650978752 | -0.299924069 | -0.339666601 | ENSG00000100292.16 | 1         |
| LHPFL2     | -0.0314358   | 0.727612179 | 1.053243801  | 1.883957031 | -0.13339367  | -0.03685991  | -1.383935739 | -0.635853992 | -0.784023688 | -0.926043248 | ENSG00000145685.13 | 1         |
| PPARG      | -0.152996946 | 0.782632722 | 1.04382468   | 1.989604882 | -0.037838887 | 0.03153341   | -0.88227019  | -0.653448432 | -1.206362842 | -0.826185683 | ENSG00000132170.19 | 1         |
| FLVCR2     | -0.074420455 | 0.601597012 | 0.729236831  | 2.160200882 | 0.071803361  | 0.179097343  | -0.975417033 | -0.756389949 | -0.965619724 | -0.98088268  | ENSG00000119686.9  | 1         |
| RFX2       | -0.335239656 | 0.612201668 | 0.176536167  | 2.070673849 | 0.16729785   | 0.446299384  | -0.949162136 | -0.914588612 | -0.68182338  | -1.3234557   | ENSG00000087903.12 | 1         |
| FAM129B    | -0.339490288 | 0.474967787 | 1.025496938  | 2.218443082 | -0.082936902 | -0.085640096 | -0.583597148 | -0.993059803 | -0.747184203 | -0.886999366 | ENSG00000136830.11 | 1         |
| CTSL       | -0.505763372 | 0.548692314 | 1.95578235   | 1.952460852 | 0.306315545  | -0.265818801 | -0.734778512 | -0.849952562 | -0.86423337  | -0.882500328 | ENSG00000135047.14 | 1         |
| SLC3A2     | -0.293433943 | 0.537314448 | 1.294117126  | 2.147883376 | 0.305401485  | -0.566284362 | -0.170465198 | -0.738714597 | -0.850501516 | -0.842501516 | ENSG00000168003.16 | 1         |
| ZNF622     | -0.404779678 | 0.737563038 | 0.977769931  | 1.844853445 | 0.696468515  | -0.408847002 | -0.456557889 | -1.198408725 | -0.757647418 | -1.030414216 | ENSG00000173545.4  | 1         |
| LMNA       | -0.402170864 | 0.609591905 | 0.85330197   | 1.772869281 | 0.859930767  | -0.153400642 | -0.573118688 | -1.242439327 | -1.348734761 | -0.375829642 | ENSG00000160789.19 | 1         |
| CD300E     | -0.269508384 | 1.027550933 | 0.947763015  | 1.425510258 | 0.747177773  | 0.123964936  | -0.580662875 | -1.394466107 | -1.138098471 | -0.89195079  | ENSG00000186407.6  | 1         |
| MMP3K8     | -0.421773282 | 0.493650244 | 1.109132132  | 1.524093429 | 0.93858926   | 0.289428836  | -0.692629012 | -1.245677066 | -1.138073876 | -0.856740665 | ENSG00000107968.9  | 1         |
| MAP3       | -0.280249633 | 0.932942579 | 0.606947472  | 1.710711515 | 0.932595476  | 0.191968093  | -0.751654302 | -1.09336841  | -1.056728099 | -1.056728099 | ENSG00000134531.9  | 1         |
| BIN1       | -0.115480387 | 0.606067225 | 0.957571466  | 1.748812059 | 0.596443149  | 0.127667378  | -0.766191707 | -1.459832768 | -0.605405186 | -1.089651229 | ENSG00000136717.14 | 1         |
| MPP1       | -0.107307701 | 0.556639109 | 1.1372282    | 1.716580249 | 0.447154422  | 0.264203856  | -0.714467074 | -1.223632645 | -0.971712382 | -1.103680655 | ENSG00000130830.14 | 1         |
| ATF4       | 0.223429078  | 0.542862777 | 1.261007842  | 1.737713495 | -0.427824427 | -0.21295446  | -0.63128011  | -1.24361535  | -1.063513216 | -0.924692298 | ENSG00000128272.14 | 1         |
| DDAH2      | 0.401330627  | 0.941020132 | 1.216704317  | 1.322555902 | 0.699303637  | -0.898495071 | -0.973964497 | -1.02791734  | -0.768686836 | -0.911850872 | ENSG00000213722.8  | 1         |
| TNNT1      | -0.239282133 | 1.317356215 | 1.327015048  | 0.922354562 | 0.900982663  | -0.903769901 | -0.717834432 | -1.150107227 | -0.912745698 | -0.543969079 | ENSG00000105048.16 | 1         |
| RGR183     | -0.247194914 | 0.788261776 | 1.144973739  | 0.927271047 | 0.451901862  | 0.123964936  | -0.580662875 | -1.394466107 | -1.138098471 | -0.89195079  | ENSG00000169508.6  | 1         |
| ZFAND6     | -0.5609919   | 1.267053705 | 1.079593314  | 0.996667694 | 0.295886525  | 0.838818022  | -1.04876049  | -0.693026407 | -1.401739402 | -0.769842881 | ENSG00000086668.18 | 1         |
| HIF0       | 0.226285093  | 0.83926012  | 1.035897115  | 1.458590289 | 0.576454128  | -0.149249723 | -0.939441441 | -0.555897504 | -1.689290262 | -0.802697544 | ENSG00000189606.5  | 1         |
| PRDM8      | 0.103819251  | 0.622345519 | 0.925821023  | 1.527432879 | 0.742721671  | 0.226486355  | -0.807636277 | -0.726786216 | -1.632105127 | -0.982099077 | ENSG00000152784.15 | 1         |
| LITAF      | -0.546203306 | 0.637122123 | 0.8837603    | 1.367171313 | 1.15797919   | 0.133611832  | -0.614560827 | -0.418419738 | -1.720359547 | -1.880046069 | ENSG00000189007.12 | 1         |
| ROCK1      | -0.04961407  | 1.637869574 | 0.792561672  | 0.254086783 | 0.828164975  | 0.61347718   | -0.508872578 | -1.0561387   | -1.370772794 | -1.422592751 | ENSG00000067606.7  | 1         |
| DNTTIP2    | -0.289014068 | 1.479846008 | 1.162562138  | 0.097913766 | 1.193676179  | 0.196735949  | -0.620227418 | -0.964763697 | -1.269710395 | -0.987018462 | ENSG00000067334.13 | 1         |
| MFAP1      | -0.137387813 | 1.629687772 | 1.355442839  | 0.526169871 | 0.341624203  | 0.145148116  | -0.617438281 | -0.822252433 | -1.003660918 | -1.417133355 | ENSG00000140259.6  | 1         |
| ADAM9      | -0.11200622  | 1.368806988 | 1.047299868  | 1.341718443 | 0.302096384  | 0.009189561  | -0.597953125 | -1.097838054 | -1.076491542 | -1.184820302 | ENSG00000168615.11 | 1         |
| NSRP1      | -0.14048793  | 1.674839733 | 0.352907956  | 1.421831525 | 0.380734725  | 0.008668024  | -0.369170801 | -1.144518491 | -1.252240567 | -0.932564174 | ENSG00000126653.7  | 1         |
| EZR        | -0.777901451 | 1.689714052 | 0.47166282   | 1.333849487 | 0.674530204  | -0.06207552  | -0.433132188 | -1.06051688  | -0.730204599 | -1.108925981 | ENSG00000092820.17 | 1         |
| ARID3B     | 0.167392042  | 0.012590257 | 1.685972697  | 0.86953     |              |              |              |              |              |              |                    |           |



|          |              |              |             |              |               |              |               |              |              |              |                    |   |
|----------|--------------|--------------|-------------|--------------|---------------|--------------|---------------|--------------|--------------|--------------|--------------------|---|
| CDI51    | 0.383930549  | -0.1825592   | 0.548339317 | 1.853957099  | 0.496776515   | 0.808228965  | -1.172802491  | -0.459459791 | -1.094483887 | -1.181927076 | ENSG00000177697.17 | 1 |
| NRIP3    | 0.073896563  | 0.875676619  | 1.551741249 | 1.105059394  | 0.171086903   | 0.31568544   | -0.803570734  | -1.351847996 | -1.212925002 | -0.724802437 | ENSG00000175352.10 | 1 |
| NRBP1    | -0.201050735 | 0.990897736  | 1.879384081 | 0.92679314   | -0.145607405  | 0.035027952  | -0.582519598  | -1.458883966 | -0.55779097  | -0.886250236 | ENSG00000151216.13 | 1 |
| RIT1     | -0.015480444 | 0.99943467   | 1.957288605 | 0.661658449  | -0.279862918  | 0.368999985  | -1.201594574  | -0.832205095 | -0.885525332 | -0.772713347 | ENSG00000143622.10 | 1 |
| RIOK3    | 0.348275302  | 0.991313537  | 1.732897717 | 0.904636394  | -0.464664299  | 0.228577881  | -1.41445201   | -0.746687325 | -0.778000805 | -0.801896392 | ENSG00000101782.14 | 1 |
| TAB2     | 0.060387812  | 0.727521865  | 1.645315003 | 1.116779547  | -0.132421108  | 0.575795348  | -1.342943536  | -0.812298073 | -0.993340032 | -0.844796827 | ENSG00000055208.18 | 1 |
| MAFB     | 0.607092704  | 0.904268925  | 1.434317169 | 1.019232655  | -0.498163658  | 0.26778001   | -1.398889126  | -1.420258669 | -0.506572581 | -0.408705242 | ENSG00000204103.3  | 1 |
| ADM      | 0.298385739  | 0.124930157  | 1.815049054 | 1.211642664  | -0.386609031  | 0.421017796  | -1.067699686  | -1.450197832 | -0.702370293 | -0.264148569 | ENSG00000148926.9  | 1 |
| GLUL     | 0.604963905  | 1.219206154  | 1.691842654 | 0.499174532  | -0.30419116   | -0.008475675 | -1.15100229   | -0.996398737 | -1.233974682 | -0.321144701 | ENSG00000135821.7  | 1 |
| GADD45A  | 0.528378271  | 0.933458726  | 1.766175768 | 0.540529374  | -0.263554375  | -0.090646346 | 0.161944995   | -1.292415454 | -1.308740043 | -0.975130917 | ENSG00000116717.11 | 1 |
| ARRDC3   | 0.199351397  | 1.165486124  | 1.112741402 | 1.033874242  | 0.534074932   | 0.032041104  | -1.693367792  | -1.199159583 | -0.613297509 | -0.571708067 | ENSG00000113369.8  | 1 |
| BCL7B    | 0.411551934  | 1.256909095  | 1.200535793 | 0.970032707  | 0.336849757   | 0.048925208  | -1.051922136  | -1.376591074 | -0.635639407 | -1.160651895 | ENSG00000106635.7  | 1 |
| TUBA1C   | 0.45563343   | 1.515987475  | 1.386943704 | 0.709190388  | -0.015773721  | -0.315307642 | -1.262768382  | -1.280369648 | -0.492473634 | -0.70106197  | ENSG00000167553.15 | 1 |
| LYAR     | -0.064280263 | 1.705818242  | 0.720042808 | 1.060388585  | 0.240885344   | -0.016314171 | -1.626194576  | -1.096035044 | -0.225620353 | -0.698690572 | ENSG00000145220.13 | 1 |
| CCDC124  | 0.312954503  | 1.078433987  | 1.102521968 | 1.10178784   | 0.138392154   | -0.690457024 | -1.631477339  | -0.392483492 | -0.47808137  | -1.15601226  | ENSG0000010780.10  | 1 |
| RAB1A    | 0.38160627   | 1.272141786  | 1.332430427 | 0.612484077  | -0.209386575  | 0.461840844  | -1.868277853  | -0.565329696 | -0.7913941   | -0.62611518  | ENSG00000138069.16 | 1 |
| NUBP1    | 0.391393265  | 1.34110106   | 1.342991135 | 0.896743522  | -0.626145229  | -0.296880044 | -1.847673329  | -0.468784245 | -0.195821254 | -0.536924521 | ENSG00000103274.10 | 1 |
| H1XF     | -0.001158625 | 1.276611725  | 1.049004873 | 1.649281409  | -0.333312509  | -0.522136774 | -0.235413432  | -0.909321913 | -1.396808915 | -0.567345839 | ENSG00000184897.5  | 1 |
| B3GN72   | 0.077248652  | 1.343662615  | 1.417059464 | 1.185128158  | -0.566520932  | -0.038114341 | -0.413140564  | -0.778976572 | -1.427543921 | -0.79883904  | ENSG00000170340.10 | 1 |
| PP4C     | 0.302152907  | 1.331949763  | 1.081306482 | 1.554239878  | -0.73533432   | -0.112299684 | -1.059329556  | -0.876280402 | -0.714445739 | -0.714445739 | ENSG00000149923.13 | 1 |
| NPL      | 0.403778691  | 1.411105276  | 0.921528056 | 1.57696712   | -0.725051644  | -0.323405076 | -0.787098723  | -0.723210764 | -1.191570047 | -0.56304898  | ENSG00000135838.13 | 1 |
| MAF      | 0.095385891  | 0.868670701  | 1.272567683 | 1.488155287  | -0.929526932  | -0.38703175  | -1.654245012  | -0.107535026 | -0.772629667 | -0.107081227 | ENSG00000178573.6  | 1 |
| NECTIN2  | 0.182511343  | 0.890107923  | 1.390280601 | 1.419828151  | -1.390449503  | 0.037399123  | -1.228786696  | -0.111735798 | -1.14895439  | -0.909672351 | ENSG00000130202.9  | 1 |
| METTL7B  | 0.628625826  | 1.240294465  | 0.437431687 | 1.532927009  | -1.02086627   | 0.632808112  | -1.02086627   | -0.754788961 | -0.654699327 | -1.02086627  | ENSG00000170439.6  | 1 |
| CLU      | 0.406824883  | 1.155050886  | 1.177446102 | 1.34588512   | -1.047642923  | 0.424818002  | -0.957691256  | -0.744472178 | -0.794820568 | -0.96310146  | ENSG00000120885.21 | 1 |
| GPAT3    | 0.740748395  | 1.357653399  | 0.372679045 | 1.425090092  | -0.605396915  | 0.310607828  | -0.800202595  | -0.522389373 | -0.509527526 | -0.792443439 | ENSG00000138678.10 | 1 |
| CCDC71L  | 0.928477268  | 1.3106132    | 1.015125059 | 0.990908904  | -0.678940466  | 0.33457111   | -0.963738449  | -1.114049225 | -0.869991938 | -0.952975463 | ENSG00000253276.2  | 1 |
| FRG1     | 0.565219386  | 1.32439414   | 1.260609118 | 1.035805115  | -0.895971582  | 0.353601309  | -1.00252089   | -0.899737144 | -0.924876312 | -0.81652287  | ENSG00000109536.11 | 1 |
| BAG3     | 0.200455081  | 1.06317312   | 1.362010149 | 1.523842659  | -1.165421383  | -0.062203607 | -0.635226968  | -0.966641736 | -0.869352834 | -0.448834481 | ENSG00000151929.9  | 1 |
| PLIN3    | 0.199406484  | 0.516725264  | 1.483253432 | 1.722728753  | -1.314593954  | -0.234888539 | -0.043407905  | -0.637476986 | -0.283690254 | -0.408056294 | ENSG00000105355.8  | 1 |
| VAT1     | 0.572372851  | 0.83551973   | 1.02350088  | 1.765906804  | -1.6458985214 | 0.118552496  | -0.521363916  | -0.351812658 | -0.254070579 | -0.61731764  | ENSG00000108828.15 | 1 |
| C1QB     | 0.852371078  | 0.651365275  | 0.795361988 | 1.473240151  | -1.50776426   | 0.226141572  | -1.50776426   | -0.506718125 | -0.040454043 | -0.435779376 | ENSG00000173369.15 | 1 |
| C1QC     | 0.714757116  | 0.74787398   | 1.717401808 | 1.920548862  | -1.230096881  | -0.266542661 | -1.230096881  | -0.467587668 | -0.449803439 | -0.456454236 | ENSG00000159189.11 | 1 |
| DTX4     | 0.722190797  | 0.322469968  | 1.497845485 | 1.366317464  | -1.125315013  | -0.162513667 | -0.272094512  | -0.326875672 | -0.398162784 | -0.164226965 | ENSG00000151004.7  | 1 |
| PIK3R1   | -0.278676118 | 0.823232224  | 1.209231589 | 1.696362374  | 0.04809956    | 0.270111016  | -1.397442187  | -0.824078171 | -0.797519117 | -0.749321172 | ENSG00000145675.14 | 1 |
| E2F3     | 0.012333891  | 0.648571459  | 1.205740526 | 1.616531195  | 0.027701577   | 0.252899717  | -1.759916511  | -0.751847184 | -0.602098214 | -0.649916455 | ENSG00000112242.14 | 1 |
| BZW1     | 0.122157615  | 0.825333446  | 1.144600427 | 1.475760177  | 0.196981334   | 0.402107668  | -1.42342779   | -1.053261583 | -1.013724166 | -0.674727029 | ENSG00000082153.17 | 1 |
| CSAR2    | 0.12026051   | 0.760670618  | 0.995782664 | 1.587944486  | -0.597003094  | 0.855596609  | -1.425148073  | -0.726492268 | -0.86221399  | -0.709342544 | ENSG00000134830.5  | 1 |
| ATP6V1F  | 0.105053686  | 0.806046965  | 0.926773314 | 1.715351893  | -0.522538697  | 0.632541257  | -1.387878771  | -0.640401935 | -0.691272815 | -0.640401935 | ENSG00000128524.4  | 1 |
| CHST2    | -0.206887812 | 1.033997971  | 1.009440568 | 1.454058959  | -0.357699677  | 0.417567975  | -1.864475034  | -0.428871826 | -0.186867933 | -0.87026319  | ENSG00000175040.5  | 1 |
| NTAN1    | -0.162083304 | 0.548722688  | 1.275690283 | 1.851693292  | -0.185221893  | -0.308187049 | -1.645434137  | -0.700711872 | -0.162179597 | -0.512228841 | ENSG00000157045.8  | 1 |
| UQCRRH   | 0.733178889  | 0.953024909  | 0.579553941 | 1.708542892  | -0.037351528  | -0.307163749 | -1.479506368  | -0.504532556 | -0.736997822 | -1.142727189 | ENSG00000173660.11 | 1 |
| NAB2     | 0.515848949  | 1.196850387  | 0.483390728 | 1.669868452  | -0.028012017  | -0.006675528 | -1.178792206  | -1.359365643 | -0.326403671 | -0.96670945  | ENSG00000166886.12 | 1 |
| NDUFB9   | 0.492863581  | 1.04139867   | 0.304199885 | 1.806685642  | -0.212744844  | 0.27695959   | -1.465659725  | -0.287836439 | -1.136429059 | -0.819437299 | ENSG00000147684.7  | 1 |
| NCL7     | 0.430181466  | 0.830888401  | 0.725375392 | 1.6140755065 | -0.05647804   | 0.381740298  | -1.0670940117 | -0.503437341 | -1.238673362 | -0.152911766 | ENSG00000108688.11 | 1 |
| INSIG1   | -0.342819248 | 0.733660171  | 0.61842785  | 1.889972497  | 0.470848449   | 0.290145193  | -1.655755913  | -0.775169446 | -0.64333639  | -0.579388098 | ENSG00000186480.12 | 1 |
| SIC16A6  | -0.228414354 | 1.278438235  | 0.566168675 | 1.542833453  | 0.326991099   | 0.3472408    | -1.669295854  | -0.879753001 | -0.663173184 | -0.625505868 | ENSG00000108932.11 | 1 |
| SPSB1    | 0.203318949  | 0.861475961  | 0.364476023 | 1.698497555  | 0.519603501   | 0.320006132  | -1.751119849  | -0.702813695 | -0.510991665 | -1.00245291  | ENSG00000171621.13 | 1 |
| RNF19A   | -0.230935591 | 0.951591674  | 1.026087732 | 1.271683768  | 0.793297509   | 0.324119947  | -1.524993922  | -0.766056604 | -0.81598029  | -1.028814223 | ENSG00000034677.12 | 1 |
| HMG83    | -0.311506669 | 0.658115216  | 1.290318654 | 1.193348418  | 0.56676734    | 0.273207671  | -1.626440113  | -0.690345428 | -0.901677558 | -0.751797202 | ENSG00000209934.10 | 1 |
| USP12    | -0.525737959 | 0.1017767245 | 1.035217724 | 1.261885328  | 0.654428691   | 0.611963951  | -1.285949422  | -1.003894936 | -0.90069581  | -0.864711041 | ENSG00000152484.13 | 1 |
| S00A10   | -0.35503063  | 1.295210728  | 0.773955241 | 1.66203443   | 0.422786567   | -0.016661956 | -0.992951539  | -1.155182728 | -0.803820626 | -0.830339489 | ENSG00000197747.8  | 1 |
| D1EE     | -0.354957965 | 1.232975339  | 1.126497651 | 1.12153967   | 0.427578826   | -0.004687031 | -1.32362859   | -0.880645515 | -0.831977835 | -0.512911787 | ENSG00000111817.16 | 1 |
| LDHA     | -0.259688924 | 1.468812749  | 0.562627682 | 1.620067917  | 0.170248619   | 0.104888227  | -1.002102923  | -0.516928628 | -0.745497062 | -0.42427656  | ENSG00000134333.13 | 1 |
| SERF2    | 0.247548703  | 1.277745995  | 0.605954108 | 1.54673097   | 0.244170572   | 0.20201992   | -1.318283615  | -0.708159573 | -0.99183092  | -1.10589598  | ENSG00000104264.19 | 1 |
| SQLE     | 0.461848133  | 1.208617326  | 0.640531248 | 1.451650627  | 0.20416645    | 0.152505491  | -1.631669165  | -0.916614885 | -0.727097459 | -0.843937766 | ENSG00000104549.11 | 1 |
| ITGB1    | 0.082296235  | 1.529694019  | 1.077205522 | 1.125641564  | 0.066274609   | 0.186523276  | -1.209261353  | -0.930841985 | -0.954540872 | -0.972991016 | ENSG00000150093.18 | 1 |
| CSF1     | 0.153683481  | 1.185291677  | 0.675959343 | 1.413445466  | 0.792512303   | 1.167937443  | -0.087016909  | -1.085618824 | -0.863891199 | -1.085618824 | ENSG00000184371.13 | 1 |
| VPS37B   | -0.161582598 | 1.072041488  | 0.793230599 | 1.44633135   | 0.837168007   | 0.028377798  | -1.407786218  | -0.585766561 | -0.883298587 | -1.13871528  | ENSG00000139722.6  | 1 |
| HMG81P21 | -0.046524399 | 1.276461549  | 0.741982099 | 1.287323184  | 0.89582113    | -0.448218002 | -1.236688179  | -1.347822469 | -0.253497455 | -0.867038268 | ENSG00000248909.1  | 1 |
| PTGER2   | 0.765013174  | 0.436944377  | 1.029645614 | 0.959325783  | 0.08601524    | 0.673269078  | -1.25494706   | -0.770238139 | -0.411858972 | -1.142727189 | ENSG00000125384.6  | 1 |
| FAM20A   | 0.431242779  | 0.731807151  | 1.134741048 | 1.09365968   | 0.030859499   | 0.506171234  | -0.2072953402 | -0.739180535 | -0.369815197 | -0.746532407 | ENSG00000108950.11 | 1 |
| C1QA     | 0.667434394  | 0.5269830    |             |              |               |              |               |              |              |              |                    |   |

|            |              |              |              |             |              |             |              |              |              |              |                     |   |
|------------|--------------|--------------|--------------|-------------|--------------|-------------|--------------|--------------|--------------|--------------|---------------------|---|
| FBXO34     | -0.080682837 | 0.746006579  | 0.472439677  | 1.6482753   | 0.476816278  | 0.835306222 | -0.658004987 | -0.845008863 | -1.128077337 | -1.467070033 | ENSG00000178974.9   | 1 |
| SPAG9      | -0.150064198 | 0.827848226  | 0.609163886  | 1.459274989 | 0.649956934  | 0.793778983 | -0.554184206 | -1.141480866 | -1.342555141 | -1.151738607 | ENSG00000008294.20  | 1 |
| MS4AAA     | 0.230803489  | 1.022718483  | 0.171699822  | 1.352320186 | 0.531390257  | 0.427486495 | -0.547347048 | -1.006305221 | -1.532469933 | -1.196269529 | ENSG0000010079.16   | 1 |
| VAPA       | 0.109164524  | 0.782765328  | 0.702564971  | 1.596042113 | 0.073345665  | 0.488907119 | -0.490520955 | -1.124857639 | -1.331867951 | -1.124857639 | ENSG00000101558.13  | 1 |
| CSGALNACT2 | 0.258506417  | 0.900673914  | 0.754791188  | 1.016103466 | 0.4432679    | 1.04306583  | -0.599220488 | -1.178368592 | -1.374227336 | -1.264592298 | ENSG00000169826.7   | 1 |
| SLC39A8    | 0.315089984  | 1.038438552  | 0.691293882  | 1.262113548 | 0.002675635  | 0.839514292 | -0.291862355 | -1.251468003 | -1.290378837 | -1.315416698 | ENSG00000138821.12  | 1 |
| FOSL1      | 0.273338072  | 0.807284048  | 1.002992855  | 0.724662674 | 0.886620253  | 0.614171623 | -0.317836839 | -1.630760709 | -1.076243755 | -1.286826211 | ENSG00000175592.8   | 1 |
| CCDC9      | 0.387162999  | 0.641878783  | 0.465463432  | 0.729244207 | 1.179092457  | 0.801535601 | -0.181630273 | -1.729551378 | -1.186683445 | -1.106512383 | ENSG00000105321.12  | 1 |
| SH3BP5     | 0.020267142  | 0.778186845  | 0.328260084  | 1.430438736 | 0.928258133  | 0.479662638 | -0.054963478 | -1.479979797 | -1.18161683  | -1.248513473 | ENSG00000131370.15  | 1 |
| IL1RAP     | -0.152001868 | 1.005801186  | -0.120046789 | 1.136233254 | 0.961406169  | 1.24343623  | -1.184124698 | -0.984480092 | -0.928713685 | -0.977509706 | ENSG00000196083.9   | 1 |
| RNF152     | -0.226893338 | 1.060005783  | 0.032902348  | 1.283942439 | 1.156520991  | 0.732907489 | -1.080071351 | -0.626992414 | -1.26883953  | -1.063482417 | ENSG00000176641.10  | 1 |
| FCAR       | 0.113968587  | 0.25728031   | 0.028954957  | 1.233748566 | 1.152178358  | 1.322360077 | -0.961256105 | -0.824169554 | -1.258175536 | -1.065429659 | ENSG00000108643.18  | 1 |
| BASP1      | 0.251066572  | 0.514519502  | 0.15088473   | 1.548139218 | 0.707425829  | 1.038704488 | -0.700805843 | -1.384931563 | -1.119037784 | -1.005965146 | ENSG00000176788.8   | 1 |
| ATP13A3    | 0.390340538  | 0.801449232  | 0.179599645  | 1.068288664 | 0.722160438  | 1.256581239 | -1.044207784 | -1.244832913 | -1.174685253 | -0.954693806 | ENSG00000133657.14  | 1 |
| ZBTB49     | 0.302980755  | 1.036279944  | -0.10619872  | 1.157080293 | 0.882149215  | 0.889972829 | -0.626222684 | -0.991848103 | -1.035129598 | -1.5735639   | ENSG00000168826.15  | 1 |
| SLC2A3     | 0.644264157  | 1.069308715  | -0.146384664 | 1.086357236 | 0.825487508  | 0.820537537 | -0.974328994 | -0.905796583 | -0.902680693 | -1.516764221 | ENSG00000059804.15  | 1 |
| GBP2       | 1.428748758  | 1.149097405  | -0.062835623 | 0.19517195  | 0.164000143  | 0.83142233  | -0.849230501 | -1.198818239 | -0.74580754  | -1.355585683 | ENSG00000162645.12  | 1 |
| TPST1      | 1.124609417  | 0.411548638  | -0.057060662 | 1.991818913 | 0.056853467  | 0.221922527 | -0.80393798  | -1.033181203 | -0.960994709 | -0.95162303  | ENSG00000169902.13  | 1 |
| CCR1       | 0.635524467  | 0.988565853  | -0.589127642 | 1.765410993 | 0.073816574  | 0.760592465 | -0.984719143 | -1.155715011 | -1.020360376 | -0.47798818  | ENSG00000163823.3   | 1 |
| DNABJ5     | -0.033534548 | 0.724225176  | -0.214639082 | 1.699608337 | 1.25899473   | 0.42189604  | -0.961177731 | -1.145969605 | -0.942730874 | -0.806672442 | ENSG00000137094.14  | 1 |
| TRIB3      | -0.015619938 | 0.66136778   | -0.075791493 | 2.06653827  | 0.86935438   | 1.199063633 | -1.115741106 | -0.908748465 | -0.9034996   | -0.776922254 | ENSG00000101255.10  | 1 |
| ARID5B     | 0.093835965  | 1.009736073  | 0.374467845  | 1.596115218 | 0.586785644  | 0.554339157 | -1.128974351 | -0.681640367 | -1.232204233 | -1.172460951 | ENSG00000150347.14  | 1 |
| IL1R1      | -0.201704881 | 0.889190939  | 0.351626992  | 2.015348221 | 0.26112113   | 0.444520058 | -1.005048153 | -0.602654581 | -1.194258487 | -0.958141237 | ENSG00000115594.11  | 1 |
| ZNF267     | 0.133540132  | 0.875313528  | 0.246621753  | 1.638738941 | 0.4193547    | 0.890910627 | -1.280692432 | -1.035973917 | -0.894963351 | -0.99284998  | ENSG00000185947.14  | 1 |
| FAM107B    | -0.032885613 | 0.888194879  | 0.430418271  | 1.619042033 | 0.5232283    | 0.756045671 | -1.205808943 | -1.153990352 | -1.136194801 | -0.691649444 | ENSG00000065809.13  | 1 |
| MERTK      | 0.638852408  | 0.848441234  | 0.00679162   | 1.27251359  | -0.393422543 | 0.803852563 | -1.271409258 | -1.034120011 | -0.912491723 | -0.958985412 | ENSG00000153208.16  | 1 |
| CS7        | 0.662584462  | 0.502632051  | 0.612043805  | 1.580228818 | -0.201516573 | 1.000835711 | -1.194037669 | -0.912615294 | -0.894348859 | -1.155806452 | ENSG00000077984.5   | 1 |
| S100A9     | 1.040511929  | 0.802608521  | 0.076101276  | 1.511568075 | -0.464238352 | 0.947999097 | -1.145702861 | -0.922725092 | -0.913990889 | -0.932313705 | ENSG00000163220.10  | 1 |
| SERPIN2    | 0.483967482  | 0.152022191  | 0.550536912  | 1.307169907 | 0.316618173  | 0.979318916 | -1.475189045 | -0.993062763 | -1.036294955 | -0.790229159 | ENSG00000197632.8   | 1 |
| AQP9       | 0.770685383  | 0.666697846  | 0.405621575  | 1.283744207 | 0.233990143  | 0.968265979 | -1.642340467 | -1.001177358 | -0.978145893 | -0.707341415 | ENSG00000103569.9   | 1 |
| S100A8     | 1.153382808  | 0.880451567  | 0.140490635  | 1.414053076 | 0.618918012  | 1.014915491 | -1.67288315  | -0.806202777 | -0.580406905 | -0.580406905 | ENSG00000143546.9   | 1 |
| ADAMT52    | 1.338506078  | -0.034442131 | 0.286565623  | 1.358837933 | -0.174515435 | 0.985719985 | -1.643595621 | -0.871250566 | -0.764387577 | -0.48143829  | ENSG00000087116.14  | 1 |
| RGSP10     | 1.00501762   | 0.545008825  | 0.342958821  | 1.804403095 | -0.613726122 | 0.350552931 | -1.639440595 | -0.742484361 | -0.405737558 | -0.646229017 | ENSG00000148908.14  | 1 |
| AG510      | 0.093263544  | 0.818808729  | 0.518868482  | 1.742089899 | -0.373016474 | 0.993927018 | -0.494888089 | -1.16359201  | -1.149479146 | -0.985260514 | ENSG00000198363.17  | 1 |
| SDC4       | 0.191029092  | 1.011193081  | 0.794054993  | 1.5836019   | -0.618318811 | 0.723736921 | -0.681634605 | -1.532464828 | -0.760898922 | -0.710307921 | ENSG00000121445.6   | 1 |
| B4GALT5    | 0.626572571  | 0.940236031  | 0.495056543  | 1.624382488 | -0.996134184 | 0.748512874 | -0.524187508 | -1.119525414 | -0.62529684  | -1.169616561 | ENSG00000158470.5   | 1 |
| POMP       | 0.584480222  | 1.15742486   | 0.565049349  | 1.629706835 | -1.013447334 | 0.468040799 | -0.472907678 | -1.084199835 | -1.007097977 | -1.827492423 | ENSG00000132963.7   | 1 |
| MAPKAPK2   | 0.484133346  | 0.829070333  | 0.107619299  | 1.430874539 | -0.684031718 | 0.550916166 | -0.191971247 | -1.158399071 | -1.086317198 | -1.245894451 | ENSG00000162889.10  | 1 |
| CD82       | 0.926854957  | 1.229483258  | 1.031627832  | 1.530354752 | -0.466461665 | 0.567796503 | -0.466870344 | -0.991648213 | -1.154512182 | -1.055215399 | ENSG000000085117.11 | 1 |
| SLA        | 1.169067443  | 0.70596524   | 0.793571874  | 0.526993025 | -0.807137519 | 1.22530817  | -0.138626816 | -1.293119646 | -1.05509417  | -1.126927602 | ENSG00000155926.13  | 1 |
| MCTP2      | 0.714234873  | 1.305946417  | 0.502932164  | 0.945812473 | -0.659982865 | 0.96901215  | -0.403683882 | -1.415280009 | -1.283193542 | -0.67367748  | ENSG00000140563.14  | 1 |
| AC091492.1 | 0.057819076  | 1.161994211  | 0.834303083  | 0.387472173 | 0.865927949  | 1.0564011   | -1.340272938 | -1.136061838 | -1.128277213 | -0.87657152  | ENSG00000225026.1   | 1 |
| OXSR1      | 0.092343798  | 1.310544644  | 0.647233616  | 0.680387976 | 0.894091684  | 0.707138647 | -1.610891048 | -1.035514752 | -0.893775644 | -0.791558923 | ENSG00000172939.8   | 1 |
| CHSY1      | 0.279107957  | 1.179189184  | 0.477919149  | 1.029194821 | 0.606074047  | 0.760447744 | -1.363571203 | -0.949533231 | -0.967306769 | -1.164097198 | ENSG00000131873.5   | 1 |
| SEC62      | 0.228353382  | 1.02090361   | 0.622230661  | 1.185650942 | 0.630732345  | 0.761760806 | -1.358545697 | -0.069203565 | -1.097635298 | -0.973307939 | ENSG00000008952.16  | 1 |
| ANKRD29    | -0.0749887   | 1.228708928  | 0.42647572   | 0.818249089 | 1.275337872  | 0.502338763 | -1.463590888 | -0.58027689  | -1.103509702 | -1.028644192 | ENSG00000206560.11  | 1 |
| ATP2B1     | -0.066945034 | 0.92490828   | 0.358624254  | 0.998983779 | 0.938964289  | 1.182362502 | -1.419811766 | -0.819390759 | -0.994018908 | -1.05241599  | ENSG00000070961.15  | 1 |
| ERMN       | -0.141345823 | 0.909489128  | 0.732920532  | 0.750620095 | 1.059049556  | 0.897961917 | -1.467378349 | -0.522813543 | -1.453427691 | -0.765075822 | ENSG00000136541.14  | 1 |
| MAFA       | 0.483318888  | 0.663521375  | 0.54734231   | 0.93699542  | 1.066050829  | 0.7423961   | -1.650538162 | -0.992444093 | -1.160807467 | -0.635835198 | ENSG00000182759.3   | 1 |
| CKNKL1     | 0.005971903  | 0.45877085   | 0.927685725  | 0.666055881 | 1.543531663  | 0.458094434 | -1.731048835 | -0.866888314 | -0.925921309 | -0.536251998 | ENSG00000101343.14  | 1 |
| AC016831.1 | -0.065106023 | 0.347416308  | 1.148186209  | 0.871096228 | 0.819199543  | 0.966074718 | -1.870934908 | -0.724200153 | -0.913256673 | -0.578475249 | ENSG00000226380.9   | 1 |
| KBTBD8     | -0.625269639 | 0.311403358  | 1.253948081  | 0.775765957 | 1.063405636  | 1.096287945 | -1.355389176 | -0.677377577 | -0.996719746 | -0.846045838 | ENSG00000163376.11  | 1 |
| MFSD14A    | 0.473023617  | 0.848855971  | 0.93138906   | 0.460803558 | 1.294392037  | 0.868733446 | -1.703372658 | -0.307310584 | -0.798630494 | -1.28732352  | ENSG00000156875.13  | 1 |
| CT9orf53   | 0.43533528   | 1.11393723   | 0.68907307   | 0.791833055 | 0.823017215  | 0.292031707 | -1.923830248 | -0.271166383 | -0.85342007  | -1.09623677  | ENSG00000104979.8   | 1 |
| TMA7       | 0.281562545  | 1.527694049  | 0.756629849  | 0.438039536 | 0.832905652  | 1.212395614 | -1.327440088 | -0.159632886 | -1.198115361 | -1.364038009 | ENSG00000232112.3   | 1 |
| RN7SKP255  | 0.375062494  | -0.14030068  | 0.762494066  | 1.520372446 | -0.142129269 | 0.069448803 | -1.533793119 | -1.08232912  | -0.734225526 | -1.312954841 | ENSG00000200312.1   | 1 |
| AC24S128.3 | 0.376795678  | 0.787786715  | 0.282571096  | 0.603545426 | 0.538004965  | 1.451572042 | -1.786044788 | -0.214650573 | -1.220809668 | -0.818770892 | ENSG0000026773.1    | 1 |
| IFNGR1     | 0.70876117   | 0.816885769  | 0.234668957  | 0.867789859 | 1.617989808  | 1.178909447 | -1.35886162  | -0.845686612 | -1.41660313  | -0.84253648  | ENSG0000027694.13   | 1 |
| AGFG1      | 0.777264795  | 0.533700682  | 0.861019953  | 0.68897197  | 0.078292625  | 1.385671253 | -1.514762641 | -0.769639241 | -1.014754785 | -1.025764611 | ENSG00000173744.17  | 1 |
| KLHL2      | 0.680250082  | 0.829475236  | 0.781962919  | 0.769284293 | -0.16405236  | 1.366624269 | -1.107002016 | -0.895451426 | -1.420761299 | -0.839816821 | ENSG00000109466.13  | 1 |
| S100A12    | 0.713128568  | 1.631900976  | 0.539922059  | 0.832140752 | -0.159654437 | 0.752786177 | -1.349936968 | -0.83115941  | -0.94751194  | -1.001615597 | ENSG00000163221.8   | 1 |
| MAN1A1     | 0.86048452   | 1.154811152  | 0.766549254  | 0.917334483 | -0.360727352 | 0.815412891 | -1.363382894 | -0.810807475 | -0.653626148 | -1.326048791 | ENSG00000111885.6   | 1 |

|           |              |              |              |              |              |              |              |              |             |             |                    |   |
|-----------|--------------|--------------|--------------|--------------|--------------|--------------|--------------|--------------|-------------|-------------|--------------------|---|
| SRSF8     | -0.364055262 | -0.966756937 | -1.464192219 | -1.13323654  | 0.616496826  | -0.234061368 | 0.153036891  | 1.479727425  | 0.84026442  | 1.072776764 | ENSG00000263465.4  | 2 |
| DIP2A     | -0.359112853 | -0.708150893 | -1.535672384 | -1.159318126 | 0.193276231  | -0.512449912 | 1.382914126  | 0.860308119  | 0.806831185 | 1.031374505 | ENSG00000160305.17 | 2 |
| TANGO6    | -0.051041549 | -0.838249504 | -1.700030916 | -1.248544196 | 0.199931577  | -0.133912014 | 1.338130744  | 0.853051881  | 0.689537546 | 0.891126463 | ENSG00000103047.7  | 2 |
| SIRPB2    | -0.134946435 | -0.852514712 | -1.923549038 | -0.897828176 | -0.00068533  | 0.272708394  | 1.513021631  | 0.638361265  | 0.597715084 | 0.787717317 | ENSG00000196209.12 | 2 |
| RTN1      | -0.693956513 | -0.953095722 | -0.992602945 | -1.452533226 | 0.539339425  | -0.407788568 | 0.957388729  | 0.805962422  | 1.295542448 | 0.901743951 | ENSG00000139970.16 | 2 |
| ARHGFE10L | -0.707983899 | -1.445352567 | -0.890647378 | -0.936110203 | 0.391616981  | -0.479995806 | 1.379609605  | 0.727077363  | 0.972715643 | 0.989070262 | ENSG00000074964.16 | 2 |
| REPIN1    | -0.131775131 | -2.002936822 | -0.752718374 | -0.796462133 | 0.168154147  | -0.19331993  | 0.498798101  | 0.965209261  | 1.079288179 | 1.165762701 | ENSG00000214022.11 | 2 |
| FAM217B   | -0.405497053 | -0.976051233 | -0.591837563 | -2.07076908  | 0.147522128  | 0.712053544  | 0.888789016  | 0.430266156  | 0.91555906  | 0.949965024 | ENSG00000196227.10 | 2 |
| CD4       | 0.075641213  | -1.624746169 | -0.087085198 | -1.76714517  | -0.068846455 | -0.070198741 | 1.108731747  | 0.756954146  | 0.781309585 | 0.895385044 | ENSG00000010610.9  | 2 |
| TARBP1    | -0.669205104 | -1.439605205 | -0.956060674 | -1.053218182 | 1.596928757  | 0.117022241  | 1.175838625  | 0.346277778  | 0.418436549 | 0.463585214 | ENSG00000059588.9  | 2 |
| ASTL      | 0.02871217   | -1.19884848  | -1.435035376 | -1.243572884 | 0.189221494  | 1.14375547   | 0.64422259   | 0.118790767  | 0.307629017 | 1.445125232 | ENSG00000188886.3  | 2 |
| TEX14     | -0.670198985 | -0.45860267  | -0.887786975 | -1.906740717 | 1.084275671  | 1.010059266  | -0.104928213 | 0.309703975  | 0.428150994 | 1.196067654 | ENSG00000121101.15 | 2 |
| RNVU1-15  | -0.625553991 | -1.117497235 | -0.787998716 | -0.409946847 | 0.379341013  | 0.113277739  | -1.168521174 | 1.726791384  | 1.319652549 | 0.570455278 | ENSG00000207205.1  | 2 |
| U1        | -0.774113053 | -0.407035917 | -0.785574679 | -1.503626952 | 0.48746144   | 0.498950881  | -0.931468798 | 1.412152201  | 1.034456565 | 0.968798314 | ENSG00000206828.1  | 2 |
| MIS18BP1  | -0.122103842 | -0.484461339 | -1.112923663 | -1.598007845 | 0.031885053  | -0.197701706 | 1.03915671   | 0.748856305  | 0.996024283 | 1.299276043 | ENSG00000204131.9  | 2 |
| CSE1L     | -0.151646677 | -0.4995276   | -1.229981824 | -1.633055692 | -0.137548918 | -0.442983367 | 0.848904729  | 1.218333086  | 0.823714002 | 1.203792261 | ENSG00000124207.16 | 2 |
| SUPT20H   | -0.402405604 | -0.32309499  | -1.116732002 | -1.250933415 | -0.217482476 | -1.042768154 | 0.906643206  | 1.179264722  | 1.176330535 | 1.091178178 | ENSG00000102710.19 | 2 |
| MIS18BP1  | -0.251422355 | 0.056717186  | -0.927199079 | -2.08305264  | -0.024468451 | -0.441011931 | 0.56063081   | 1.003684353  | 1.06044165  | 1.045680457 | ENSG00000129534.13 | 2 |
| BTG2      | -0.237436779 | -0.494758199 | -1.118655399 | -1.665798577 | -0.343945581 | -0.124251808 | 0.448963772  | 0.988445283  | 1.033390415 | 1.514046672 | ENSG00000159388.5  | 2 |
| TMEM131L  | 0.177646617  | -0.322493253 | -0.963110262 | -1.649587462 | -1.026350837 | -0.156654191 | 0.610785289  | 0.911001593  | 1.14011934  | 1.278643168 | ENSG00000121210.15 | 2 |
| IER2      | -0.079812449 | -0.619012747 | -0.54380738  | -1.505048227 | -0.677136443 | -0.69936456  | 0.396859457  | 0.86704389   | 1.204226584 | 1.656051874 | ENSG00000160888.6  | 2 |
| CIITA     | 0.259716334  | -1.60110661  | -0.913772997 | -0.674039605 | -0.327525403 | -0.792260021 | 1.399179328  | 0.763714987  | 1.055089624 | 0.831004363 | ENSG00000179583.18 | 2 |
| FAAH      | -0.046329387 | -1.10686149  | -0.892293569 | -0.75164517  | -0.903915125 | -0.388779185 | 1.937641783  | 0.572590844  | 1.027987649 | 0.551603649 | ENSG00000117480.15 | 2 |
| TNF       | -0.660521352 | -1.586823971 | -0.626691782 | 0.208752367  | -0.845522923 | -0.589815563 | 1.253210723  | 0.60135482   | 1.337548523 | 0.908509158 | ENSG00000232810.3  | 2 |
| WDR36     | -0.581528455 | -0.928717192 | -1.328728646 | -0.321696404 | -0.612300991 | -0.404535288 | 1.838889187  | 0.773065979  | 0.476901213 | 1.088650598 | ENSG00000134987.11 | 2 |
| C2CD2L    | 0.423282324  | -0.354269393 | -1.354426425 | -0.940808804 | -0.990933341 | -0.793751477 | 1.264890212  | 0.673048495  | 1.321266834 | 0.751701575 | ENSG00000172375.12 | 2 |
| GIMAP4    | 0.376981277  | -0.41055671  | -1.008860702 | -1.058700951 | -0.395663406 | -1.489866408 | 1.337641745  | 0.708474445  | 0.98329901  | 0.957251701 | ENSG00000133574.9  | 2 |
| GPBAR1    | 0.313998053  | -0.901592483 | -1.462108532 | -1.086641967 | -0.047844264 | -0.779191868 | 0.858525685  | 0.6712065    | 1.140512216 | 1.29313666  | ENSG00000179921.14 | 2 |
| DDX58     | 0.205811466  | -0.033632401 | -0.255085667 | -1.019829801 | -1.674959404 | -1.090736667 | 1.236716752  | 0.767518307  | 0.935621498 | 0.92875917  | ENSG00000107201.9  | 2 |
| ST6GAL1   | -0.484892117 | 0.538168284  | -0.850602611 | -0.979134366 | -1.280864213 | -0.949449752 | 1.396705935  | 0.730785511  | 0.95125661  | 0.928026719 | ENSG00000073849.14 | 2 |
| OLIG1     | -0.183328421 | -0.665714866 | -0.619171349 | -1.086775735 | -0.728595748 | -1.137957332 | 1.473344207  | 0.85957468   | 0.899100319 | 1.189524244 | ENSG00000184221.12 | 2 |
| APEX1     | -0.252566745 | -0.975860395 | -0.416720945 | -0.765118453 | -1.243815819 | -0.75397087  | 1.530012312  | 0.892260594  | 1.009708166 | 0.976072153 | ENSG00000100823.11 | 2 |
| AOAH-IT1  | -0.865107984 | -0.194985362 | -0.495562311 | -0.436707539 | -1.126902412 | -1.126902412 | 1.743758152  | 0.768940412  | 1.093709714 | 0.639759742 | ENSG00000230539.1  | 2 |
| GIMAP7    | -0.184679359 | 0.146297123  | -0.810557825 | -0.472906932 | -1.122852842 | -1.475995683 | 1.721821375  | 0.772755001  | 0.561803287 | 0.864315856 | ENSG00000179144.4  | 2 |
| FCER1A    | -1.197218231 | -0.810442495 | -0.581227332 | -0.483035103 | 0.0078828    | -1.197218231 | 1.36917841   | 1.322153492  | 0.626477649 | 0.943449041 | ENSG00000179639.10 | 2 |
| NID1      | -1.045024598 | -0.359158278 | -0.460627548 | -1.148811245 | 0.396491738  | -0.958464589 | 1.662080202  | -0.082244368 | 1.450826766 | 0.544931922 | ENSG00000116962.14 | 2 |
| ZFP36L2   | -0.355094705 | 0.036444742  | -0.694521263 | -1.922929575 | -0.611312184 | -0.301657143 | 1.53183534   | 1.019019679  | 0.637702899 | 0.660512208 | ENSG00000152518.7  | 2 |
| CDIP1     | -0.766230308 | -0.792831969 | -0.418678424 | -1.440219928 | -0.563847022 | -0.193994562 | 1.74499995   | 0.9533368    | 0.997477963 | 0.479987499 | ENSG00000089486.16 | 2 |
| MAP4K1    | -1.098821153 | -1.134167301 | 0.14459264   | -0.95936484  | -0.394130579 | -0.274883105 | 2.108284895  | 0.42242787   | 0.653807066 | 0.532254507 | ENSG00000104814.12 | 2 |
